# Supplementary material for: Confirmation of the southern African distribution of the marine sponge Hymeniacidon perlevis (Montagu, 1814) in the context of its global dispersal
Source: PubMed Central journal article supplement (PMC9703993; doi:10.7717/peerj.14388), 2022-11-25
Supplement: peerj-10-14388-s007.pdf [file peerj-10-14388-s007.pdf]

Hymeniacidon TS4860 Haga Haga  
Hymeniacidon TS4861 Haga Haga  
Hymeniacidon TS4855 Dwesa  
Hymeniacidon TS4841 Dwesa  
Hymeniacidon TS1167 S5 Tsitsikamma  
Hymeniacidon TS1166 S4 Knysna  
Hymeniacidon TS6066 P23 Haga Haga  
Hymeniacidon TS2765 P14 Mazzeppa Bay  
Hymeniacidon TS2766 Mazzeppa Bay  
Hymeniacidon TS6065 P22 Marshstrand  
Hymeniacidon TS6064 P21 Dwesa  
Hymeniacidon TS6057 P20 Dwesa  
Hymeniacidon TS6056 P19 Dwesa  
Hymeniacidon TS4844 P18 Dwesa  
Hymeniacidon TS3359 P16 Dwesa  
Hymeniacidon TS2126 P7 Bettys Bay  
Hymeniacidon TS2935 Groen Rivier  
Hymeniacidon TS2942 Groen Rivier  
Hymeniacidon TS2943 Moon Bay  
Hymeniacidon TS2946 Moon Bay  
Hymeniacidon TS2957 Moon Bay  
Hymeniacidon TS2962 Brazil North  
Hymeniacidon TS2963 Rooiklippies  
Hymeniacidon TS2742 P12 Momwabisi  
Hymeniacidon TS2738 P11 False Bay  
Hymeniacidon TS2744 P13 Strand  
Hymeniacidon TS2737 P10 Saunders Rock  
Hymeniacidon TS2736 P9 Greenpoint  
Hymeniacidon TS 359 P5 Groenrivier

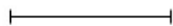

0.00020
