# Supplementary material for: Confirmation of the southern African distribution of the marine sponge Hymeniacidon perlevis (Montagu, 1814) in the context of its global dispersal
Source: PeerJ journal article supplement (doi:10.7717/peerj.14388), 2022-11-25
Supplement: Suplimentary_Figure_2_global_Phylogeny_new.pdf [file Suplimentary_Figure_2_global_Phylogeny_new.pdf]

Hymeniacion perlevis JX477030 Portugal  
Hymeniacion perlevis MGB885803 Argentina  
Hymeniacion perlevis JX477024 Portugal  
Hymeniacion perlevis JX477022 Portugal  
Hymeniacion perlevis JX477021 Portugal  
Hymeniacion perlevis JX477019 Portugal  
Hymeniacion perlevis JX477020 Portugal  
Hymeniacion perlevis JX477018 Portugal  
Hymeniacion perlevis JX477015 Portugal  
Hymeniacion perlevis JX477031 Portugal  
Hymeniacion perlevis JX477033 Portugal  
Hymeniacion perlevis JX477034 Portugal  
Hymeniacion perlevis JX477035 Portugal  
Hymeniacion perlevis JX477036 Portugal  
Hymeniacion perlevis KY492569 Portugal  
Hymeniacion perlevis KY492567 Portugal  
Hymeniacion perlevis KY492551 Portugal  
Hymeniacion perlevis KY492554 Portugal  
Hymeniacion perlevis JX477037 Portugal  
Hymeniacion perlevis KF225481 Portugal  
Hymeniacion perlevis KY492580 Portugal  
Hymeniacion perlevis KY492575 Portugal  
Hymeniacion perlevis KY492553 Portugal  
Hymeniacion perlevis KY492565 Portugal  
Hymeniacion perlevis KY492579 Portugal  
Hymeniacion perlevis KY492552 Portugal  
Hymeniacion perlevis MGB885805 Argentina  
Hymeniacion perlevis KY492582 Portugal  
Hymeniacion perlevis MGB885804 Argentina  
Hymeniacion perlevis KY492578 Portugal  
Hymeniacion perlevis KY492561 Portugal  
Hymeniacion perlevis KY492583 Portugal  
Hymeniacion perlevis MGB885802 Argentina  
Hymeniacion perlevis KY492574 Portugal  
Hymeniacion perlevis JX477043 Portugal  
Hymeniacion heliophila EU076812 Brazil  
Hymeniacion perlevis JX477042 Portugal  
Hymeniacion perlevis JX477045 Portugal  
Hymeniacion perlevis JX477026 Portugal  
Hymeniacion perlevis JX477032 Portugal  
Hymeniacion perlevis JX477044 Portugal  
Hymeniacion perlevis KY492581 Portugal  
Hymeniacion perlevis KY492584 Portugal  
Hymeniacion perlevis KY492572 Portugal  
Hymeniacion perlevis JX477041 Portugal  
Hymeniacion perlevis KY492559 Portugal  
Hymeniacion TS2126 P7 Betty's Bay  
Hymeniacion TS2935 Groen Rivier  
Hymeniacion TS2942 Groen Rivier  
Hymeniacion TS2943 Moon Bay  
Hymeniacion TS2946 Moon Bay  
Hymeniacion TS2957 Moon Bay  
Hymeniacion TS2962 Brazil North  
Hymeniacion TS2963 Rooiklipies  
Hymeniacion TS2742 P12 Mombwasi  
Hymeniacion TS2738 P11 False Bay  
Hymeniacion TS2744 P13 Strand  
Hymeniacion TS2737 P10 Saunders Rock  
Hymeniacion TS2736 P9 Greenpoint  
Hymeniacion TS 359 P5 Groenrivier  
Hymeniacion perlevis JX477039 Portugal  
Hymeniacion heliophila EF519631 Caribbean  
Hymeniacion heliophila EF519629 Caribbean  
Hymeniacion heliophila EF519630 Caribbean  
Hymeniacion heliophila EF519632 Caribbean  
Hymeniacion perlevis KY492556 Portugal  
Hymeniacion sinapium 129  
Hymeniacion sinapium 247  
Hymeniacion sinapium 79  
Hymeniacion sinapium EF217329 Korea  
Hymeniacion sinapium EF217330 Korea  
Hymeniacion sinapium EF217331 Korea  
Hymeniacion perlevis JX477040 Portugal  
Hymeniacion perlevis KY492555 Portugal  
Hymeniacion perlevis JX477017 Portugal  
Hymeniacion perlevis JX477038 Portugal  
Hymeniacion sinapium HM035986 Unknown  
Hymeniacion sinapium EF217332 California Mission Bay  
Hymeniacion sinapium KP136744 Turkey Black Sea  
Hymeniacion sinapium HQ829181 Unknown  
Hymeniacion perlevis HM035985 Unknown  
Hymeniacion perlevis HM035984 Unknown  
Hymeniacion perlevis HM035983 Unknown  
Hymeniacion sinapium KF192342 Korea  
Hymeniacion TS2766 Mazzeppa Bay  
Hymeniacion TS2765 P14 Mazzeppa Bay  
Hymeniacion TS6066 P23 Haga Haga  
Hymeniacion TS1166 S4 Knysna  
Hymeniacion TS1167 S5 Tsitsikamma  
Hymeniacion TS4841 Dwesa  
Hymeniacion TS4855 Dwesa  
Hymeniacion TS4860 Haga Haga  
Hymeniacion TS4861 Haga Haga  
Hymeniacion TS6065 P22 Marshstrand  
Hymeniacion TS6064 P21 Dwesa  
Hymeniacion TS6057 P20 Dwesa  
Hymeniacion TS6056 P19 Dwesa  
Hymeniacion TS4844 P18 Dwesa  
Hymeniacion TS3359 P16 Dwesa  
Hymeniacion perlevis JX477023 Portugal  
Hymeniacion perlevis JX477025 Portugal  
Hymeniacion perlevis JX477027 Portugal  
Hymeniacion perlevis JX477028 Portugal  
Hymeniacion perlevis JX477029 Portugal  
Hymeniacion perlevis JX477016 Portugal  
Hymeniacion perlevis KF225482 Portugal  
Hymeniacion perlevis KY492576 Portugal  
Hymeniacion perlevis KY492564 Portugal  
Hymeniacion perlevis KY492571 Portugal  
Hymeniacion perlevis KY492573 Portugal  
Hymeniacion perlevis KY492577 Portugal  
Hymeniacion perlevis KY492568 Portugal  
Hymeniacion flavia EF217335 Korea  
Hymeniacion flavia EF217334 Korea  
Hymeniacion flavia EF217333 Korea

/meniacion TS2126 P7 Betty  
/meniacion TS2935 Groen R  
/meniacion TS2942 Groen R  
/meniacion TS2943 Moon B.  
/meniacion TS2946 Moon B.  
/meniacion TS2957 Moon B.  
/meniacion TS2962 Brazil N  
/meniacion TS2963 Rooiklip  
/meniacion TS2742 P12 Mor  
/meniacion TS2738 P11 Fals  
/meniacion TS2744 P13 Stra  
/meniacion TS2737 P10 Sau  
/meniacion TS2736 P9 Gree  
/meniacion TS 359 P5 Groer  
/meniacion perlevis JX4770:  
/meniacion heliophila EF519  
/meniacion heliophila EF519  
/meniacion heliophila EF519  
/meniacion heliophila EF519  
/meniacion perlevis KY4925  
/meniacion sinapium 129  
/meniacion sinapium 247  
/meniacion sinapium 79  
/meniacion sinapium EF217329 Korea  
/meniacion sinapium EF217330 Korea  
/meniacion sinapium EF217331 Korea  
Hymeniacion perlevis JX477040 Portugal  
Hymeniacion perlevis KY492555 Portugal  
Hymeniacion perlevis JX477017 Portugal  
Hymeniacion perlevis JX477038 Portugal  
— Hymeniacion sinapium HM035986 Unknown  
/meniacion sinapium EF217332 California Mission Bay  
/meniacion sinapium KP136744 Turkey Black Sea  
/meniacion sinapium HQ829181 Unknown  
/meniacion perlevis HM035985 Unknown  
/meniacion perlevis HM035984 Unknown  
/meniacion perlevis HM035983 Unknown  
/meniacion sinapium KF192342 Korea  
/meniacion sinapium EF217332 California Mission Bay  
/meniacion sinapium KP136744 Turkey Black Sea  
/meniacion sinapium HQ829181 Unknown  
/meniacion perlevis HM035985 Unknown  
/meniacion perlevis HM035984 Unknown  
/meniacion perlevis HM035983 Unknown  
/meniacion sinapium KF192342 Korea

Hymeniacion perlevis JX477030 Portugal  
Hymeniacion perlevis MGB885803 Argentina  
Hymeniacion perlevis JX477024 Portugal  
Hymeniacion perlevis JX477022 Portugal  
Hymeniacion perlevis JX477021 Portugal  
Hymeniacion perlevis JX477019 Portugal  
Hymeniacion perlevis JX477020 Portugal  
Hymeniacion perlevis JX477018 Portugal  
Hymeniacion perlevis JX477015 Portugal  
Hymeniacion perlevis JX477031 Portugal  
Hymeniacion perlevis JX477033 Portugal  
Hymeniacion perlevis JX477034 Portugal  
Hymeniacion perlevis JX477035 Portugal  
Hymeniacion perlevis JX477036 Portugal  
Hymeniacion perlevis KY492569 Portugal  
Hymeniacion perlevis KY492567 Portugal  
Hymeniacion perlevis KY492551 Portugal  
Hymeniacion perlevis KY492554 Portugal  
Hymeniacion perlevis JX477037 Portugal  
Hymeniacion perlevis KY492580 Portugal  
Hymeniacion perlevis KY492575 Portugal  
Hymeniacion perlevis KY492553 Portugal  
Hymeniacion perlevis KY492565 Portugal  
Hymeniacion perlevis KY492579 Portugal  
Hymeniacion perlevis KY492552 Portugal  
Hymeniacion perlevis MGB885805 Argentina  
Hymeniacion perlevis KY492582 Portugal  
Hymeniacion perlevis MGB885804 Argentina  
Hymeniacion perlevis KY492578 Portugal  
Hymeniacion perlevis KY492561 Portugal  
Hymeniacion perlevis KY492583 Portugal  
Hymeniacion perlevis MGB885802 Argentina  
Hymeniacion perlevis KY492574 Portugal  
Hymeniacion perlevis JX477043 Portugal  
Hymeniacion heliophila EU076812 Brazil  
Hymeniacion perlevis JX477042 Portugal  
Hymeniacion perlevis JX477045 Portugal  
Hymeniacion perlevis JX477026 Portugal  
Hymeniacion perlevis JX477032 Portugal  
Hymeniacion perlevis JX477044 Portugal  
Hymeniacion perlevis KY492581 Portugal  
Hymeniacion perlevis KY492584 Portugal  
Hymeniacion perlevis KY492572 Portugal  
Hymeniacion perlevis JX477041 Portugal  
Hymeniacion perlevis KY492559 Portugal  
Hymeniacion TS2766 Mazzeppa Bay  
Hymeniacion TS2765 P14 Mazzeppa Bay  
Hymeniacion TS6066 P23 Haga Haga  
Hymeniacion TS1166 S4 Knysna  
Hymeniacion TS1167 S5 Tsitsikamma  
Hymeniacion TS4841 Dwesa  
Hymeniacion TS4855 Dwesa  
Hymeniacion TS4860 Haga Haga  
Hymeniacion TS4861 Haga Haga  
Hymeniacion TS6065 P22 Marshstrand  
Hymeniacion TS6064 P21 Dwesa  
Hymeniacion TS6057 P20 Dwesa  
Hymeniacion TS6056 P19 Dwesa  
Hymeniacion TS4844 P18 Dwesa  
Hymeniacion TS3359 P16 Dwesa  
Hymeniacion perlevis JX477023 Portugal  
Hymeniacion perlevis JX477025 Portugal  
Hymeniacion perlevis JX477027 Portugal  
Hymeniacion perlevis JX477028 Portugal  
Hymeniacion perlevis JX477029 Portugal  
Hymeniacion perlevis JX477016 Portugal  
Hymeniacion perlevis KF225482 Portugal  
Hymeniacion perlevis KY492576 Portugal  
Hymeniacion perlevis KY492564 Portugal  
Hymeniacion perlevis KY492571 Portugal  
Hymeniacion perlevis KY492573 Portugal  
Hymeniacion perlevis KY492577 Portugal  
Hymeniacion perlevis KY492568 Portugal  
Hymeniacion flavia EF217335 Korea  
Hymeniacion flavia EF217334 Korea  
Hymeniacion flavia EF217333 Korea
