# Supplementary material for: Confirmation of the southern African distribution of the marine sponge Hymeniacidon perlevis (Montagu, 1814) in the context of its global dispersal
Source: PeerJ. 2022 Nov 25;10:e14388. doi: 10.7717/peerj.14388 (PMC9703993; doi:10.7717/peerj.14388)
Supplement: Table S1 [file peerj-10-14388-s009.xlsx]

## Sheet: H. perlevis global distr
Genus/Species	Valid Genus/Species	Morphology and Molecular data	Locus	Genbank#	Collection location	Lat	degree	minute	seconds	Lat decimal degree	Long	Degree	Minute	Seconds	Long decimal degree	Citation	Occurance (Habitat Type)	Distribution (Spading et al., 2007	Notes
Hymeniacidon perlevis	Hymeniacidon perlevis	Molecular and Morphology data	CO1	AF437301	France	48°43'37.91"N	48	43	37.91	48.723	3°59'1.98"W	3	59	1.98	-3.98366	Erpenbeck et al. 2002	Intertidal Rocky Shore	Temperate Northern Atlantic
Hymeniacidon perlevis	Hymeniacidon perlevis	Molecular and Morphology data	CO1	AY625662	Netherlands	51°58'8.60"N	51	58	8.6	51.9681	4° 5'22.97"E	4	5	22.97	4.08716	Erpenbeck et al. 2006	Intertidal Rocky Shore	Temperate Northern Atlantic
Hymeniacidon perlevis	Hymeniacidon perlevis	Molecular and Morphology data	CO1	HM035983	China	39°18'23.72"N	39	18	23.72	39.304	122°19'25.04"E	122	19	25.04	122.321	Cao,H., Cao,X., Xue,S. and Zhang,W., unpub.	Harbour	Cold Temperate North West Pacific
Hymeniacidon perlevis	Hymeniacidon perlevis	Molecular and Morphology data	CO1	JX477015	Portugal	37°20'50.89"N	37	20	50.89	37.3418	8°51'12.97"W	8	51	12.97	-8.85216	Alex et al. 2012	Intertidal Rocky Shore	Temperate Northern Atlantic
Hymeniacidon perlevis	Hymeniacidon perlevis	Molecular and Morphology data	CO1	JX477016	Portugal	37°38'45.93"N	37	38	45.93	37.641	8°48'12.84"W	8	48	12.84	-8.80214	Alex et al. 2012	Intertidal Rocky Shore	Temperate Northern Atlantic
Hymeniacidon perlevis	Hymeniacidon perlevis	Molecular and Morphology data	CO1	JX477017	Portugal	37°51'24.09"N	37	51	24.09	37.854	8°47'39.75"W	8	47	39.75	-8.78996	Alex et al. 2012	Intertidal Rocky Shore	Temperate Northern Atlantic
Hymeniacidon perlevis	Hymeniacidon perlevis	Molecular and Morphology data	CO1	JX477018	Portugal	41° 5'6.68"N	41	5	6.68	41.0844	8°39'28.89"W	8	39	28.89	-8.65481	Alex et al. 2012	Intertidal Rocky Shore	Temperate Northern Atlantic
Hymeniacidon perlevis	Hymeniacidon perlevis	Molecular and Morphology data	CO1	JX477019	Portugal	41° 3'2.22"N	41	3	2.22	41.0504	8°39'33.84"W	8	39	33.84	-8.65564	Alex et al. 2012	Intertidal Rocky Shore	Temperate Northern Atlantic
Hymeniacidon perlevis	Hymeniacidon perlevis	Molecular and Morphology data	CO1	JX477020	Portugal	41°13'58.91"N	41	13	58.91	41.2265	8°43'28.01"W	8	43	28.01	-8.72133	Alex et al. 2012	Intertidal Rocky Shore	Temperate Northern Atlantic
Hymeniacidon perlevis	Hymeniacidon perlevis	Molecular and Morphology data	CO1	JX477021	Portugal	41°34'10.28"N	41	34	10.28	41.5684	8°48'5.12"W	8	48	5.12	-8.80085	Alex et al. 2012	Intertidal Rocky Shore	Temperate Northern Atlantic
Hymeniacidon perlevis	Hymeniacidon perlevis	Molecular and Morphology data	CO1	JX477022	Portugal	41°15'57.32"N	41	15	57.32	41.2596	8°43'42.74"W	8	43	42.74	-8.72379	Alex et al. 2012	Intertidal Rocky Shore	Temperate Northern Atlantic
Hymeniacidon perlevis	Hymeniacidon perlevis	Molecular and Morphology data	CO1	JX477023	Portugal	41°40'58.01"N	41	40	58.01	41.6763	8°50'16.51"W	8	50	16.51	-8.83609	Alex et al. 2012	Intertidal Rocky Shore	Temperate Northern Atlantic
Hymeniacidon perlevis	Hymeniacidon perlevis	Molecular and Morphology data	CO1	KU697713	Spain	43°35'32.66"N	43	35	32.66	43.5888	5°55'31.66"W	5	55	31.66	-5.92194	Miralles et al. 2016	Harbour/Inlet	Temperate Northern Atlantic
Hymeniacidon perlevis	Hymeniacidon perlevis	Molecular and Morphology data	CO1	KU697714	Spain	43°33'56.08"N	43	33	56.08	43.5593	6° 8'41.41"W	6	8	41.41	-6.14023	Miralles et al. 2016	Harbour/Inlet	Temperate Northern Atlantic
Hymeniacidon perlevis	Hymeniacidon perlevis	Molecular and Morphology data	CO1	KY492551	Portugal	41° 41′ 48,79′′	41	41	48.79	41.6915	8 51′ 4,03′′W	8	51	4.03	-8.85067	Regueiras et al. 2019	Inlet/harbour	Temperate Northern Atlantic
Hymeniacidon perlevis	Hymeniacidon perlevis	Molecular and Morphology data	CO1	KY492552	Portugal	41°34'14.61"N	41	34	14.61	41.5691	8°48'0.42"W	8	48	0.42	-8.80007	Regueiras et al. 2019	Inlet/harbour	Temperate Northern Atlantic
Hymeniacidon perlevis	Hymeniacidon perlevis	Molecular and Morphology data	CO1	KY492553	Portugal	41° 29′ 17.34′′	41	29	17.34	41.4862	8 46′ 59.38′′	8	46	59.38	-8.77656	Regueiras et al. 2019	Intertidal Rocky Shore	Temperate Northern Atlantic
Hymeniacidon perlevis	Hymeniacidon perlevis	Molecular and Morphology data	CO1	KY492554	Portugal	41° 16′ 6.08′′	41	16	6.08	41.2677	8 43′ 33.39′′	8	43	33.39	-8.72223	Regueiras et al. 2019	Intertidal Rocky Shore	Temperate Northern Atlantic
Hymeniacidon perlevis	Hymeniacidon perlevis	Molecular and Morphology data	CO1	KY492555	Portugal	41° 13′ 52.27′′	41	13	52.27	41.2254	8 43′ 18.34′′W	8	43	18.34	-8.71972	Regueiras et al. 2019	Intertidal Rocky Shore	Temperate Northern Atlantic
Hymeniacidon perlevis	Hymeniacidon perlevis	Molecular and Morphology data	CO1	KY492556	Portugal	41° 2'33.69"N	41	2	33.69	41.0389	8°39'23.62"W	8	39	23.62	-8.65394	Regueiras et al. 2019	Intertidal Rocky Shore	Temperate Northern Atlantic
Hymeniacidon perlevis	Hymeniacidon perlevis	Molecular and Morphology data	CO1	KY492557	Portugal	40° 9′ 22.36′′	40	9	22.36	40.1537	8 52′ 18.49′′	8	52	18.49	-8.86975	Regueiras et al. 2019	Intertidal Rocky Shore	Temperate Northern Atlantic
Hymeniacidon perlevis	Hymeniacidon perlevis	Molecular and Morphology data	CO1	KY492558	Portugal	38°36'49.37"N	38	36	49.37	38.6082	9°20'3.24"W	9	20	3.24	-9.33387	Regueiras et al. 2019	Intertidal Rocky Shore	Temperate Northern Atlantic
Hymeniacidon perlevis	Hymeniacidon perlevis	Molecular and Morphology data	CO1	KY492559	Portugal	37° 52′ 3.04′′	37	52	3.04	37.8672	8 47′ 37.19′′	8	47	37.19	-8.78953	Regueiras et al. 2019	Intertidal Rocky Shore	Temperate Northern Atlantic
Hymeniacidon perlevis	Hymeniacidon perlevis	Molecular and Morphology data	CO1	KY492560	Portugal	37°42'37.78"N	37	42	37.78	37.7063	8°48'37.92"W	8	48	37.92	-8.80632	Regueiras et al. 2019	Inlet	Temperate Northern Atlantic
Hymeniacidon perlevis	Hymeniacidon perlevis	Molecular and Morphology data	CO1	KY492561	Portugal	37° 39′ 2.7′′	37	39	2.7	37.6504	8 48′ 10.8′′W	8	48	10.8	-8.8018	Regueiras et al. 2019	Intertidal Rocky Shore	Temperate Northern Atlantic
Hymeniacidon perlevis	Hymeniacidon perlevis	Molecular and Morphology data	CO1	MG885803	Argentina: Rio Negro, Instituto	40° 43′37′′S,	40	43	37	-40.7228	64 54′35′′W	64	54	35	-64.9058	Gastaldi et al. 2018	Intertidal and shallow subtidal	Warm Temperate Southwestern Atlantic
Hymeniacidon perlevis	Hymeniacidon perlevis	Molecular and Morphology data	CO1	MG885804	Argentina: Rio Negro, Instituto	40° 43′37′′S,	40	43	37	-40.7228	64 54′35′′W	64	54	35	-64.9058	Gastaldi et al. 2018	Intertidal and shallow subtidal	Warm Temperate Southwestern Atlantic
Hymeniacidon perlevis	Hymeniacidon perlevis	Molecular and Morphology data	CO1	MG885805	Argentina: Rio Negro, Instituto	40° 43′37′′S,	40	43	37	-40.7228	64 54′35′′W	64	54	35	-64.9058	Gastaldi et al. 2018	Intertidal and shallow subtidal	Warm Temperate Southwestern Atlantic
Hymeniacidon perlevis	Hymeniacidon perlevis	Molecular and Morphology data	CO1	MG885802	Argentina: Rio Negro, Instituto	40° 43′37′′S,	40	43	37	-40.7228	64 54′35′′W	64	54	35	-64.9058	Gastaldi et al. 2018	Intertidal and shallow subtidal	Warm Temperate Southwestern Atlantic
Hymeniacidon sinapium	Hymeniacidon perlevis	Molecular and Morphology data	CO1	EF217329	Korea	33°14'16.33"N	33	14	16.33	33.2361	126°33'36.67"E	126	33	36.67	126.556	Park et al 2007	Intertidal Rocky Shore	Cold Temperate North West Pacific
Hymeniacidon sinapium	Hymeniacidon perlevis	Molecular and Morphology data	CO1	EF217330	Korea	34°49'4.82"N	34	49	4.82	34.8175	128°41'12.46"E	128	41	12.46	128.685	Park et al 2007	Intertidal Rocky Shore	Cold Temperate North West Pacific
Hymeniacidon sinapium	Hymeniacidon perlevis	Molecular and Morphology data	CO1	EF217331	Korea	36°42'28.24"N	36	42	28.24	36.7047	126° 9'57.28"E	126	9	57.28	126.16	Park et al 2007	Intertidal Rocky Shore	Cold Temperate North West Pacific
Hymeniacidon sinapium	Hymeniacidon perlevis	Molecular and Morphology data	CO1	EF217332	Mission Bay, San Diego, California	32°46'34.87"N	32	46	34.87	32.7725	117°15'33.05"W	117	15	33.05	-117.256	Park et al 2007	Harbour	Warm Temperate Northeast Pacific
Hymeniacidon sinapium	Hymeniacidon perlevis	Molecular and Morphology data	CO1 (from mitogenome)	KF192342	Daecheon Beach, Korea	36°19'45.85"N	36	19	45.85	36.3243	126°30'22.04"E	126	30	22.04	126.504	Jun et al. 2015	Harbour	Cold Temperate North West Pacific
Hymeniacidon sinapium	Hymeniacidon perlevis	Molecular and Morphology data	CO1	KP136744	Black Sea, Turkey	41°28'58.61"N	42	28	58.61	42.4764	29°22'39.32"E	29	22	39.32	29.3732	Kolukirik,M., Karahan,A. and Ozturk,D.I., unpub.	Black Sea	Temperate Northern Atlantic
Hymeniacidon sinapium	Hymeniacidon perlevis	Molecular and Morphology data	CO1	MT007960	Carpinteria, California	34° 9'12.46"N	34	9	12.46	34.1521	119°15'0.63"W	119	15	0.63	-119.25	Turner, 2020	Inlet	Warm Temperate Northeast Pacific
Hymeniacidon perlevis	Hymeniacidon perlevis	Molecular and Morphology data	18S	DQ206445	Dalian, China	38°56'19.43"N	38	56	19.43	38.9366	121°39'30.15"E	121	39	30.15	121.655	Cao,X., Fu,W., Yu,X. and Zhang,W., unpub.	Harbour	Cold Temperate Northwest Pacific
Hymeniacidon sinapium	Hymeniacidon perlevis	Molecular and Morphology data	18S	HQ829180	Dalian (Yellow Sea, China)	39° 1'21.32"N	39	1	21.32	39.0202	121°44'57.19"E	121	44	57.19	121.743	Cao,H., Cao,X., Xue,S. and Zhang,W., unpub.	Harbour	Cold Temperate Northwest Pacific
Hymeniacidon sinapium	Hymeniacidon perlevis	Molecular and Morphology data	18S	MT001298	Tajigus, Santa Barbara	34°24'37.40"N	34	24	37.4	34.4062	119°55'21.96"W	119	55	21.96	-119.92	Turner, 2020	Intertidal and shallow subtidal	Warm Temperate Northeast Pacific
Hymeniacidon sinapium	Hymeniacidon perlevis	Molecular and Morphology data	ITS	AB373166	Japan	41°21'25.98"N	40	21	25.98	40.3543	140°28'59.20"E	140	28	59.2	140.477	Hoshino et al. 2008	Small Harbour and Bay	Cold Temperate Northwest Pacific
Hymeniacidon sinapium	Hymeniacidon perlevis	Morphology only			Japan	33°27'25.07"N	33	27	25.07	33.4542	132°14'44.74"E	132	14	44.74	132.241	Hoshino et al. 2008	Small Harbour	Cold Temperate Northwest Pacific
Hymeniacidon sinapium	Hymeniacidon perlevis	Molecular and Morphology data	ITS	AB373167	Japan	33°22'55.26"N	33	22	55.26	33.3759	133°17'18.98"E	133	17	18.98	133.286	Hoshino et al. 2008	Inlet	Cold Temperate Northwest Pacific
Hymeniacidon sinapium	Hymeniacidon perlevis	Molecular and Morphology data	ITS	JQ658455	Elkhorn Slough, CA	35.771°N	35.771		35.771	35.777	-121.389	121.389			-121.389	Fuller & Hughey, 2013	kelp forests, estuaries and bays	Warm Temperate Northeast Pacific
Hymeniacidon perlevis	Hymeniacidon perlevis	Morphology only			Cape Verde	16°35'35.73"N	16	35	35.73	16.5893	22°57'40.82"W	22	57	40.82	-22.9568	Ridley and Dendy 1886; Van Soest 1993	Dredge	Temperate Northern Atlantic
Hymeniacidon sinapium	Hymeniacidon perlevis	Morphology only			Santa Barbara	34.4677	34.4677			34.4677	-120.119	-120.119			120.119	Turner, 2020	Kelp bed - largely buried in sediment	Cold Temperate North East Pacific
Hymeniacidon sinapium	Hymeniacidon perlevis	Molecular and Morphology data	CO1	MT007958, MT001298, MT006362	Santa Barbara	34.4628	34.4628			34.4628	-120.102	-120.102			120.102	Turner, 2020	Kelp bed - largely buried in sediment	Cold Temperate North East Pacific
Hymeniacidon sinapium	Hymeniacidon perlevis	Morphology only			Santa Barbara	34.4221	34.4221			34.4221	-119.952	-119.952			119.952	Turner, 2020	Kelp bed - largely buried in sediment	Cold Temperate North East Pacific
Hymeniacidon sinapium	Hymeniacidon perlevis	Morphology only			Santa Barbara	34.4045	34.4045			34.4045	-119.879	-119.879			119.879	Turner, 2020	Kelp bed - largely buried in sediment	Cold Temperate North East Pacific
Hymeniacidon sinapium	Hymeniacidon perlevis	Morphology only			Santa Barbara	34.4028	34.4028			34.4028	-119.858	-119.858			119.858	Turner, 2020	Kelp bed - largely buried in sediment	Cold Temperate North East Pacific
Hymeniacidon sinapium	Hymeniacidon perlevis	Molecular and Morphology data	CO1	MT007959, MT007960	Santa Barbara	34.3916	34.3916			34.3916	-119.542	-119.542			119.542	Turner, 2020	Kelp bed - largely buried in sediment	Cold Temperate North East Pacific
Hymeniacidon sinapium	Hymeniacidon perlevis	Morphology only			Los Angeles	33°50'14.73"N	33	50	14.73	33.8358	118°25'4.00"W	118	25	4	-118.417	Turner, 2020	Kelp bed - largely buried in sediment	Cold Temperate North East Pacific
Hymeniacidon sinapium	Hymeniacidon perlevis	Morphology only			Los Angeles	33.765	33.765			33.765	-118.428	118.428			-118.428	Turner, 2020	Kelp bed - largely buried in sediment	Cold Temperate North East Pacific
Hymeniacidon perlevis	Hymeniacidon perlevis	Morphology only			Canada	48°25'0.48"N	48	25	0.48	48.4167	125°40'26.31"W	125	40	26.31	-125.671	Harbo et al., 2022	Harbour (Rocky Shore and Mudflats and oyster beds)	Temperate Northern Pacific	limited to approximately 4.5 km of shoreline
Hymeniacidon perlevis	Hymeniacidon perlevis	Morphology only			Canada	48°38'45.67"N	48	38	45.67	48.6409	125°54'44.02"W	125	54	44.02	-125.907	Harbo et al., 2022	Harbour (Rocky Shore and Mudflats and oyster beds)	Temperate Northern Pacific	limited to approximately 4.5 km of shoreline
Hymeniacidon perlevis	Hymeniacidon perlevis	Morphology only			Canada	48°41'1.76"N	48	41	1.76	48.6836	126° 4'34.24"W	126	4	34.24	-126.072	Harbo et al., 2022	Harbour (Rocky Shore and Mudflats and oyster beds)	Temperate Northern Pacific	limited to approximately 4.5 km of shoreline
Hymeniacidon perlevis	Hymeniacidon perlevis	Morphology only			Canada	48°46'26.97"N	48	46	26.97	48.7712	126°10'29.93"W	126	10	29.93	-126.172	Harbo et al., 2022	Harbour (Rocky Shore and Mudflats and oyster beds)	Temperate Northern Pacific	limited to approximately 4.5 km of shoreline
Hymeniacidon perlevis	Hymeniacidon perlevis	Morphology only			New Zealand	34°24'46.46"S	34	24	46.46	-34.4077	172°59'17.76"E	172	59	17.76	172.986	Bergquest 1970	Intertidal Rocky Shore	Temperate Australasia	North Island only
Hymeniacidon perlevis	Hymeniacidon perlevis	Morphology only			New Zealand	34°25'7.01"S	34	25	7.01	-34.4178	172°51'24.75"E	172	51	24.75	172.854	Bergquest 1971	Intertidal Rocky Shore	Temperate Australasia	North Island only
Hymeniacidon perlevis	Hymeniacidon perlevis	Morphology only			New Zealand	35°15'32.79"S	35	15	32.79	-35.2555	174° 6'59.19"E	174	6	59.19	174.11	Bergquest 1972	Intertidal Rocky Shore	Temperate Australasia	North Island only
Hymeniacidon perlevis	Hymeniacidon perlevis	Morphology only			New Zealand	36°37'17.58"S	36	37	17.58	-36.6196	174°43'59.27"E	174	43	59.27	174.727	Bergquest 1973	Intertidal Rocky Shore	Temperate Australasia	North Island only
Hymeniacidon perlevis	Hymeniacidon perlevis	Morphology only			New Zealand	35°49'6.42"S	35	49	6.42	-35.8177	174°29'46.05"E	174	29	46.05	174.491	Bergquest 1974	Intertidal Rocky Shore	Temperate Australasia	North Island only
Hymeniacidon perlevis	Hymeniacidon perlevis	Morphology only			New Zealand	36° 5'19.99"S	36	5	19.99	-36.0867	175°16'45.53"E	175	16	45.53	175.274	Bergquest 1975	Intertidal Rocky Shore	Temperate Australasia	North Island only
Hymeniacidon perlevis	Hymeniacidon perlevis	Morphology only			New Zealand	36°47'9.64"S	36	47	9.64	-36.7849	174°49'57.61"E	174	49	57.61	174.826	Bergquest 1976	Intertidal Rocky Shore	Temperate Australasia	North Island only
Hymeniacidon perlevis	Hymeniacidon perlevis	Morphology only			New Zealand	36°46'11.32"S	36	46	11.32	-36.7686	174°53'40.46"E	174	53	40.46	174.89	Bergquest 1977	Intertidal Rocky Shore	Temperate Australasia	North Island only
Hymeniacidon perlevis	Hymeniacidon perlevis	Morphology only			New Zealand	36°41'37.04"S	36	41	37.04	-36.6895	174°58'11.97"E	174	58	11.97	174.969	Bergquest 1978	Intertidal Rocky Shore	Temperate Australasia	North Island only
Hymeniacidon perlevis	Hymeniacidon perlevis	Morphology only			New Zealand	36°46'26.22"S	36	46	26.22	-36.771	174°46'30.16"E	174	46	30.16	174.772	Bergquest 1979	Intertidal Rocky Shore	Temperate Australasia	North Island only
Hymeniacidon perlevis	Hymeniacidon perlevis	Morphology only			New Zealand	36°48'54.58"S	36	48	54.58	-36.8091	174°48'22.68"E	174	48	22.68	174.804	Bergquest 1980	Intertidal Rocky Shore	Temperate Australasia	North Island only
Hymeniacidon perlevis	Hymeniacidon perlevis	Morphology only			New Zealand	36°49'45.62"S	36	49	45.62	-36.8243	174°46'52.67"E	174	46	52.67	174.775	Bergquest 1981	Intertidal Rocky Shore	Temperate Australasia	North Island only
Hymeniacidon perlevis	Hymeniacidon perlevis	Morphology only			New Zealand	36°37'5.71"S	36	37	5.71	-36.6176	175° 3'47.95"E	175	3	47.95	175.058	Bergquest 1982	Intertidal Rocky Shore	Temperate Australasia	North Island only
Hymeniacidon perlevis	Hymeniacidon perlevis	Morphology only			New Zealand	36°50'53.25"S	36	50	53.25	-36.8422	174°51'42.31"E	174	51	42.31	174.857	Bergquest 1983	Intertidal Rocky Shore	Temperate Australasia	North Island only
Hymeniacidon perlevis	Hymeniacidon perlevis	Morphology only			New Zealand	36°28'5.80"S	36	28	5.8	-36.4676	175°20'58.04"E	175	20	58.04	175.343	Bergquest 1984	Intertidal Rocky Shore	Temperate Australasia	North Island only
Hymeniacidon perlevis	Hymeniacidon perlevis	Morphology only			New Zealand	36°57'36.02"S	36	57	36.02	-36.956	174°27'48.58"E	174	27	48.58	174.458	Bergquest 1985	Intertidal Rocky Shore	Temperate Australasia	North Island only
Hymeniacidon perlevis	Hymeniacidon perlevis	Morphology only			New Zealand	36°56'4.75"S	36	56	4.75	-36.9341	174°27'0.46"E	174	27	0.46	174.45	Bergquest 1986	Intertidal Rocky Shore	Temperate Australasia	North Island only
Hymeniacidon perlevis	Hymeniacidon perlevis	Molecular and Morphology data	18S	KC902358	Northern Ireland, Walter	54°42'46.69"N	54	42	46.69	54.7078	5°48'22.31"W	5	48	22.31	-5.80372	Redmond et al. 2013 (Collected by Bernard Picton	Inlet/Harbour/Intertidal Rocky Shore	Temperate Northern Atlantic
Hymeniacidon perlevis	Hymeniacidon perlevis	Morphology only			Ireland, Arran Islands	53° 6'41.68"N	53	6	41.68	53.1069	9°38'49.26"W	9	38	49.26	-9.64154	Hanitsch, 1891	Dredge off Arran Island, west coast of Ireland, Galway Bay	Temperate Northern Atlantic
Hymeniacidon perlevis	Hymeniacidon perlevis	Molecular and Morphology data			Bettys Bay	34° 22.446 S	34	22.446		-34.3741	18 54.766 E	18	54.766	54.766	18.9219	Samaai data	Kelp Bed	Temperate Southern Africa (Cold and Warm)
Hymeniacidon perlevis	Hymeniacidon perlevis	Molecular and Morphology data			Brazil North	29° 48.600	29	48.6		-29.81	17o 04,800	17	4.8	4.8	17.0808	Samaai data	Intertidal Rocky Shore	Temperate Southern Africa (Cold and Warm)
Hymeniacidon perlevis	Hymeniacidon perlevis	Molecular and Morphology data			Dwesa/Cwebe MPA	32°18'47.04"S	32	18	47.04	-32.3078	28°50'11.96"E	28	50	11.96	28.8353	Samaai data	Intertidal Rocky Shore	Temperate Southern Africa (Cold and Warm)
Hymeniacidon perlevis	Hymeniacidon perlevis	Molecular and Morphology data			Elands Bay	32°18'55.54"S	32	18	55.54	-32.3093	18°19'40,30"E	18	19	40.3	18.3234	Samaai data	Intertidal Rocky Shore	Temperate Southern Africa (Cold and Warm)
Hymeniacidon perlevis	Hymeniacidon perlevis	Molecular and Morphology data			False Bay	34°07'28"S	34	7	28	-34.1213	18°27'10"E	18	27	10	18.4517	Samaai data	Intertidal Rocky Shore	Temperate Southern Africa (Cold and Warm)
Hymeniacidon perlevis	Hymeniacidon perlevis	Molecular and Morphology data			Gonubie	32.941393	32,941393			-32.9414	28.0358	28.0358			28.0358	Samaai data	Intertidal Rocky Shore	Temperate Southern Africa (Cold and Warm)
Hymeniacidon perlevis	Hymeniacidon perlevis	Molecular and Morphology data			Green Point	33°53'56"S	33	53	56	-33.8927	18°22'37"E	18	22	37	18.3728	Samaai data	Intertidal Rocky Shore	Temperate Southern Africa (Cold and Warm)
Hymeniacidon perlevis	Hymeniacidon perlevis	Molecular and Morphology data			Groenrivier	30°28'59.83"S	30	28	59.83	-30.4766	17°18'28.59"E	17	18	28.59	17.3048	Samaai data	Intertidal Rocky Shore	Temperate Southern Africa (Cold and Warm)
Hymeniacidon perlevis	Hymeniacidon perlevis	Molecular and Morphology data			Groenrivier	30° 56.811	30	56.811		-30.9469	17o 38,106	17	38.106	38.106	17.6415	Samaai data	Intertidal Rocky Shore	Temperate Southern Africa (Cold and Warm)
Hymeniacidon perlevis	Hymeniacidon perlevis	Molecular and Morphology data			Groenrivier	30° 54.926	30	54.926		-30.9154	17o 36,169	17	36.169	36.169	17.6088	Samaai data	Intertidal Rocky Shore	Temperate Southern Africa (Cold and Warm)
Hymeniacidon perlevis	Hymeniacidon perlevis	Molecular and Morphology data			Haga Haga	32°45' 50.653"S	32	45	50.653	-32.7584	28°15' 5,393"S	28	15	5.393	28.2509	Samaai data	Intertidal Rocky Shore	Temperate Southern Africa (Cold and Warm)
Hymeniacidon perlevis	Hymeniacidon perlevis	Molecular and Morphology data			Jacobs Bay	32°58'10.62"S	32	58	10.62	-32.9684	17°53'03,81"E	17	53	3.81	17.884	Samaai data	Intertidal Rocky Shore	Temperate Southern Africa (Cold and Warm)
Hymeniacidon perlevis	Hymeniacidon perlevis	Molecular and Morphology data			Knysna	33° 59.392S	33	59.392		-33.9899	23 32,538E	23	32.538	32.538	23.5477	Samaai data	Intertidal Rocky Shore	Temperate Southern Africa (Cold and Warm)
Hymeniacidon perlevis	Hymeniacidon perlevis	Molecular and Morphology data			Langebaan	33° 5'22.15"S	33	5	22.15	-33.087	18° 1'8,03"E	18	1	8.03	18.018	Samaai data	Intertidal Rocky Shore	Temperate Southern Africa (Cold and Warm)
Hymeniacidon perlevis	Hymeniacidon perlevis	Molecular and Morphology data			Mazzepa Bay	32°28'46"S	32	28	46	-32.4743	28°39'08"E	28	39	8	28.6513	Samaai data	Intertidal Rocky Shore	Temperate Southern Africa (Cold and Warm)
Hymeniacidon perlevis	Hymeniacidon perlevis	Molecular and Morphology data			Monwabisi	34°4'28"S	34	4	28	-34.0713	18°41'19"E	18	41	19	18.6865	Samaai data	Intertidal Rocky Shore	Temperate Southern Africa (Cold and Warm)
Hymeniacidon perlevis	Hymeniacidon perlevis	Molecular and Morphology data			Moon Bay	30° 48.639	30	48.639		-30.8106	17o 33,235	17	33.235	33.235	17.5595	Samaai data	Intertidal Rocky Shore	Temperate Southern Africa (Cold and Warm)
Hymeniacidon perlevis	Hymeniacidon perlevis	Molecular and Morphology data			Grosse Bucht (Namibia)	26°44'17.24"S	26	44	17,24	-26.7362	15° 3'31.75"E	15	3	31,75	15.0553	Samaai data	Intertidal Rocky Shore	Temperate Southern Africa (Cold and Warm)
Hymeniacidon perlevis	Hymeniacidon perlevis	Molecular and Morphology data			Nature Valley	33° 59'59.93"S	33	59	59.93	-33.9933	23° 31'31,41"S	23	31	31.41	23.5219	Samaai data	Intertidal Rocky Shore	Temperate Southern Africa (Cold and Warm)
Hymeniacidon perlevis	Hymeniacidon perlevis	Molecular and Morphology data			Plettenberg Bay	34°6'29"E	34	6	29	-34.1048	23.3807	23.381	38068	23.3807	657.852	Samaai data	Intertidal Rocky Shore	Temperate Southern Africa (Cold and Warm)
Hymeniacidon perlevis	Hymeniacidon perlevis	Molecular and Morphology data			Rooiklippies	29°44'29.59"S	29	44	29.58	-29.7383	17° 3'28,16"E	17	3	28.16	17.0547	Samaai data	Intertidal Rocky Shore	Temperate Southern Africa (Cold and Warm)
Hymeniacidon perlevis	Hymeniacidon perlevis	Molecular and Morphology data			Saunders Rocks	33°52'37"S	33	52	37	-33.8728	18°24'29"E	18	24	29	18.4048	Samaai data	Intertidal Rocky Shore	Temperate Southern Africa (Cold and Warm)
Hymeniacidon perlevis	Hymeniacidon perlevis	Molecular and Morphology data			Strand	34°07'30"S	34	7	30	-34.1217	18°49'50"E	18	49	50	18.825	Samaai data	Intertidal Rocky Shore	Temperate Southern Africa (Cold and Warm)
Hymeniacidon perlevis	Hymeniacidon perlevis	Molecular and Morphology data			Tsitsikamma National Park	34° 01'.25.82"S	34	1	25.82	-34.021	23° 53'51,40"S	23	53	51.4	23.8919	Samaai data	Intertidal Rocky Shore	Temperate Southern Africa (Cold and Warm)
Hymeniacidon perlevis	Hymeniacidon perlevis	Molecular and Morphology data			Jacobs Bay	32°58'10.62"S	32	58	10.62	-32.9684	17°53'03,81"E	17	53	3.81	17.884	Samaai data	Intertidal Rocky Shore	Temperate Southern Africa (Cold and Warm)
Hymeniacidon perlevis	Hymeniacidon perlevis	Molecular and Morphology data			False Bay, -34.1566667 18.84	34° 9'31.16"S	34	9	31.16	-34.1552	18°48'35.61"E	18	48	35.61	18.8059	Samaai data	Intertidal Rocky Shore	Temperate Southern Africa (Cold and Warm)
Hymeniacidon perlevis	Hymeniacidon perlevis	Molecular and Morphology data			Elizabeth Bay, 20 miles south of Luderitz	26.938554° S	26,938554			-26.9386	15,159444° E	15.1594			15.1594	Samaai data	Intertidal Rocky Shore	Temperate Southern Africa (Cold and Warm)
Hymeniacidon perlevis	Hymeniacidon perlevis	Molecular and Morphology data			St. James	34.120579° S	34,120579			-34.1206	18,459106° E	18.4591			18.4591	Samaai data	Intertidal Rocky Shore	Temperate Southern Africa (Cold and Warm)
Hymeniacidon perlevis	Hymeniacidon perlevis	Molecular and Morphology data			Oudekraal	33.983584° S	33,983584			-33.9836	18,358262° E	18.3583			18.3583	Samaai data	Intertidal Rocky Shore	Temperate Southern Africa (Cold and Warm)
Hymeniacidon perlevis	Hymeniacidon perlevis	Molecular and Morphology data			Oudekraal	33.983584° S	33,983584			-33.9836	18,358262° E	18.3583			18.3583	Samaai data	Intertidal Rocky Shore	Temperate Southern Africa (Cold and Warm)
Hymeniacidon perlevis	Hymeniacidon perlevis	Molecular and Morphology data			Port Nolloth	29.251883° S	29,251883			-29.2519	16,869698° E	16.8697			16.8697	Samaai data	Intertidal Rocky Shore	Temperate Southern Africa (Cold and Warm)
Hymeniacidon perlevis	Hymeniacidon perlevis	Molecular and Morphology data			East London	33.011051° S	33,011051			-33.0111	27,910049° E	27.91			27.91	Samaai data	Intertidal Rocky Shore	Temperate Southern Africa (Cold and Warm)
Hymeniacidon perlevis	Hymeniacidon perlevis	Morphology only			Hout Bay	34° 4'20.01"S	34	4	20.01	-34.07	18°20'11.83"E	18	20	11.83	18.3353	Stephens, 1915	Intertidal Rocky Shore	Temperate Southern Africa (Cold and Warm)
Hymeniacidon sinapium	Hymeniacidon perlevis	Morphology only			San Miguel	35.434 N	35.434			35.434	-121,008°W	121.008			-121.008	Bakus and Green 1987	Intertidal Rocky Shore	Warm Temperate Northeast Pacific
Hymeniacidon sinapium	Hymeniacidon perlevis	Morphology only			Santa Rosa Islands	34° 1'21.58"N	34	1	21.58	34.0203	120° 4'34.11"W	120	4	0.11	-120.067	Bakus and Green 1987	Intertidal Rocky Shore	Warm Temperate Northeast Pacific
Hymeniacidon sinapium	Hymeniacidon perlevis	Morphology only			Catalina	33°12'17.24"N	33	12	17.24	33.2029	117°24'57.33"W	117	24	57.33	-117.41	Sim and Bakus 1986; Bakus and Green 1987	(Harbour/Inlet) Intertidal Rocky Shore	Warm Temperate Northeast Pacific
Hymeniacidon sinapium	Hymeniacidon perlevis	Morphology only			San Clemente	33°24'54.39"N	33	24	54.39	33.4091	117°37'26.64"W	117	37	26.64	-117.621	Sim and Bakus 1986; Bakus and Green 1988	Intertidal Rocky Shore	Warm Temperate Northeast Pacific
Hymeniacidon perlevis	Hymeniacidon perlevis	Morphology only			St Vincent, Cape Verde Islands	14° 54' 0" N	14	54	0	14.9	23° 31' 0" W	23	31	0	-23.5167	Ridley, S.O.; Dendy, A. (1887)	Shallow reef	Temperate Northern Atlantic
Hymeniacidon perlevis	Hymeniacidon perlevis	Morphology only			Fayal, Praya Pim, Azores	38° 31' 30" N	38	31	30.3	38.5217	28° 37' 34" W	28	37	0.34	-28.6167	Topsent, E. (1892).	(Harbour/Inlet) Intertidal Rocky Shore	Temperate Northern Atlantic
Hymeniacidon perlevis	Hymeniacidon perlevis	Morphology only			Devon	50°36'24.91"N	50	36	24.9	50.6041	3°21'41.94"W	3	21	2.94	-3.35049	Montagu, G. (1818)	Inlet	Temperate Northern Atlantic
Hymeniacidon perlevis	Hymeniacidon perlevis	Morphology only			Western Mediterranean	40°48'28.34"N	40	48	28.34	40.8047	14° 2'33.54"E	14	2	0.54	14.0334	Maas, 1894	Intertidal Rocky Shore	Temperate Northern Atlantic
Hymeniacidon perlevis	Hymeniacidon perlevis	Morphology only			Susak, Adriatic Sea	44° 29' 0" N	44	29	0	44.4833	14° 18' 0" E	14	18	0	14.3	Babiç, K. (1922	Intertidal Rocky Shore	Temperate Northern Atlantic
Hymeniacidon perlevis	Hymeniacidon perlevis	Morphology only			Aegean Sea	39° 22' 0" N	39	22	0	39.3667	24° 18' 0" E	24	18	0	24.3	Voultsiadou, E. (2005)	Intertidal Rocky Shore	Temperate Northern Atlantic
Hymeniacidon perlevis	Hymeniacidon perlevis	Morphology only			Punta de la Almina, Alborean Sea	35° 54' 30" N	35	54	30.3	35.9051	5° 17' 18" W	5	17	0.18	-5.28336	Pansini, M. (1987)	Intertidal Rocky Shore	Temperate Northern Atlantic
Hymeniacidon perlevis	Hymeniacidon perlevis	Morphology only			Roscoff, Le Beclem	48° 44' 0" N	48	44	0	48.7333	3° 40' 0" W	3	40	0	-3.66667	Topsent, E.	Intertidal Rocky Shore	Temperate Northern Atlantic
Hymeniacidon perlevis	Hymeniacidon perlevis	Morphology only			Leuca	39° 47' 0" N	39	47	0	39.7833	18° 21' 0" E	18	21	0	18.35	Pulitzer-Finali, G. (1983).	Harbour	Temperate Northern Atlantic
Hymeniacidon perlevis	Hymeniacidon perlevis	Molecular and Morphology data	18S	MG888735.1	France, Wimereux	50°45′49.15′′N	50	45	49.15	50.7582	01°35′55.47′′E	1	35	0.47	1.58341	Gastaldi et al. 2018	harbour/Intertidal Rocky Shore	Temperate Northern Atlantic
Hymeniacidon perlevis	Hymeniacidon perlevis	Morphology only			Tiree, United Kindom	56°28'50.92"N	56	28	50.92	56.4752	6°52'57.34"W	6	52	57.34	-6.87622	Ackers et al	Intertidal Rocky Shore and Harbours and Inlets	Temperate Northern Atlantic
Hymeniacidon perlevis	Hymeniacidon perlevis	Morphology only			Loch Sween	55°59'31.99"N	55	59	31.99	55.9887	5°36'58.55"W	5	36	58.55	-5.60976	Ackers et al	Loch	Temperate Northern Atlantic
Hymeniacidon perlevis	Hymeniacidon perlevis	Morphology only			Menai Straits	53°14'22.10"N	53	14	22.1	53.237	4° 4'51.14"W	4	4	51.14	-4.07519	Ackers et al	Inlet/Harbour	Temperate Northern Atlantic
Hymeniacidon perlevis	Hymeniacidon perlevis	Morphology only			Strangford Lough	54°28'58.33"N	54	28	58.33	54.4764	5°32'16.95"W	5	32	16.95	-5.53616	Ackers et al	Lough	Temperate Northern Atlantic
Hymeniacidon perlevis	Hymeniacidon perlevis	Morphology only			Ireland - Lough Hyne	51°28'55.83"N	51	28	55.83	51.476	9°17'22.47"W	9	17	22.47	-9.28708	Ackers et al	Lough	Temperate Northern Atlantic
Hymeniacidon perlevis	Hymeniacidon perlevis	Morphology only			Ireland - Wexford	52°20'15.13"N	52	20	15.13	52.3359	6°27'24.84"W	6	27	24.84	-6.45414	Ackers et al	Inlet/Harbour/Bay	Temperate Northern Atlantic
Hymeniacidon perlevis	Hymeniacidon perlevis	Morphology only			Sussex	50°49'35.90"N	50	49	35.9	50.8227	0°14'44.22"W	0	14	44.22	-0.240703	Ackers et al	Harbour	Temperate Northern Atlantic
Hymeniacidon perlevis	Hymeniacidon perlevis	Morphology only			The Solent, United Kingdom	50°46'35.94"N	50	46	35.94	50.7727	1°13'34.93"W	1	13	34.93	-1.22249	Ackers et al	Inlet	Temperate Northern Atlantic
Hymeniacidon perlevis	Hymeniacidon perlevis	Morphology only			Lundy	51°10'41.22"N	51	10	41.22	51.1735	4°40'2.28"W	4	40	2.28	-4.66705	Ackers et al	Intertidal Rocky Shore	Temperate Northern Atlantic
Hymeniacidon perlevis	Hymeniacidon perlevis	Morphology only			Dyfed	51°39'2.05"N	51	39	2.05	51.6503	4°16'43.95"W	4	16	43.95	-4.27399	Ackers et al	Inlet/Bay	Temperate Northern Atlantic
Hymeniacidon perlevis	Hymeniacidon perlevis	Morphology only			Dorset	50°37'31.99"N	50	37	31.99	50.622	2°18'59.46"W	2	18	59.46	-2.30991	Ackers et al	Intertidal Rocky Shore	Temperate Northern Atlantic
Hymeniacidon perlevis	Hymeniacidon perlevis	Morphology only			Jersey	49°15'26.82"N	49	15	26.82	49.2545	2° 9'45.14"W	2	9	45.14	-2.15752	Ackers et al	Intertidal Rocky Shore	Temperate Northern Atlantic
Hymeniacidon_heliophila	Hymeniacidon perlevis	Molecular and Morphology data	COI	EF519631	Florida, West Palm Beach (Caribbean)	26°46'15.79"N	26	46	15.79	26.7693	80° 1'37.88"W	80	1	37.88	-80.023	Erpenbeck et al. 2007	Harbour/inlet	Warm Temperate Northwest Atlantic (overlap with Tropical Atlantic)	Thomas, 2020 paper supports the claim that they are all H. perlevis as well.
Hymeniacidon_heliophila	Hymeniacidon perlevis	Molecular and Morphology data	COI	EF519629	Florida, West Palm Beach (Caribbean)	27°28'24.59"N	27	28	24.59	27.4708	80°16'35.32"W	80	16	35.32	-80.2726	Erpenbeck et al. 2007	Harbour/inlet	Warm Temperate Northwest Atlantic (overlap with Tropical Atlantic)	Thomas, 2020 paper supports the claim that they are all H. perlevis as well.
Hymeniacidon_heliophila	Hymeniacidon perlevis	Molecular and Morphology data	COI	EF519630	Florida, West Palm Beach (Caribbean)	26°46'15.79"N	26	46	15.79	26.7693	80° 1'37.88"W	80	1	37.88	-80.023	Erpenbeck et al. 2007	Harbour/inlet	Warm Temperate Northwest Atlantic (overlap with Tropical Atlantic)	Thomas, 2020 paper supports the claim that they are all H. perlevis as well.
Hymeniacidon_heliophila	Hymeniacidon perlevis	Molecular and Morphology data	COI	EF519632	Florida, West Palm Beach (Caribbean)	26°46'15.79"N	26	46	15.79	26.7693	80° 1'37.88"W	80	1	37.88	-80.023	Erpenbeck et al. 2007	Harbour/inlet	Warm Temperate Northwest Atlantic (overlap with Tropical Atlantic)	Thomas, 2020 paper supports the claim that they are all H. perlevis as well.
Hymeniacidon_heliophila	Hymeniacidon perlevis	Molecular and Morphology data	COI	EU076812	Rio de Janeiro, Brazil	23° 0'36.63"S	23	0	36.63	23.0061	43° 8'8.14"W	43	8	8.14	-43.1347	Turque et al., 2008	Harbour/Inlet/Island	Warm Temperate Southwestern Atlantic	Thomas, 2020 paper supports the claim that they are all H. perlevis as well.
Hymeniacidon heliophila	Hymeniacidon perlevis	Molecular and Morphology data	ITS	JF824787	Alabama, Dauphin Island	30° 4'53.30"N	30	4	53.3	30.0755	88° 1'47.69"W	88	1	47.69	-88.0246	(Erwin, Olson, Thacker, 2011 (see also Thomas et al., 2020)	Harbour/Inlet/Island	Warm Temperate Northwest Atlantic	Thomas, 2020 paper supports the claim that they are all H. perlevis as well.
Hymeniacidon heliophila	Hymeniacidon perlevis	Molecular and Morphology data	ITS	JF824788	Alabama, Dauphin Island	30° 4'53.30"N	30	4	53.3	30.0755	88° 1'47.69"W	88	1	47.69	-88.0246	(Erwin, Olson, Thacker, 2011 (see also Thomas et al., 2020)	Harbour/Inlet/Island	Warm Temperate Northwest Atlantic	Thomas, 2020 paper supports the claim that they are all H. perlevis as well.
Hymeniacidon heliophila	Hymeniacidon perlevis	Molecular and Morphology data	ITS	JF824789	Alabama, Dauphin Island	30° 4'53.30"N	30	4	53.3	30.0755	88° 1'47.69"W	88	1	47.69	-88.0246	(Erwin, Olson, Thacker, 2011 (see also Thomas et al., 2020)	Harbour/Inlet/Island	Warm Temperate Northwest Atlantic	Thomas, 2020 paper supports the claim that they are all H. perlevis as well.
Hymeniacidon heliophila	Hymeniacidon perlevis	Molecular and Morphology data	ITS	JF824790	Alabama, Dauphin Island	30° 4'53.30"N	30	4	53.3	30.0755	88° 1'47.69"W	88	1	47.69	-88.0246	(Erwin, Olson, Thacker, 2011 (see also Thomas et al., 2020)	Harbour/Inlet/Island	Warm Temperate Northwest Atlantic	Thomas, 2020 paper supports the claim that they are all H. perlevis as well.
Hymeniacidon heliophila	Hymeniacidon perlevis	Molecular and Morphology data	ITS	JF824791	Alabama, Dauphin Island	30° 4'53.30"N	30	4	53.3	30.0755	88° 1'47.69"W	88	1	47.69	-88.0246	(Erwin, Olson, Thacker, 2011 (see also Thomas et al., 2020)	Harbour/Inlet/Island	Warm Temperate Northwest Atlantic	Thomas, 2020 paper supports the claim that they are all H. perlevis as well.
Hymeniacidon heliophila	Hymeniacidon perlevis	Molecular and Morphology data	ITS	JF824792	Alabama, Dauphin Island	30° 4'53.30"N	30	4	53.3	30.0755	88° 1'47.69"W	88	1	47.69	-88.0246	(Erwin, Olson, Thacker, 2011 (see also Thomas et al., 2020)	Harbour/Inlet/Island	Warm Temperate Northwest Atlantic	Thomas, 2020 paper supports the claim that they are all H. perlevis as well.
Hymeniacidon heliophila	Hymeniacidon perlevis	Molecular and Morphology data	ITS	JF824793	Alabama, Dauphin Island	30° 4'53.30"N	30	4	53.3	30.0755	88° 1'47.69"W	88	1	47.69	-88.0246	(Erwin, Olson, Thacker, 2011 (see also Thomas et al., 2020)	Harbour/Inlet/Island	Warm Temperate Northwest Atlantic	Thomas, 2020 paper supports the claim that they are all H. perlevis as well.
Hymeniacidon heliophila	Hymeniacidon perlevis	Molecular and Morphology data	ITS	JF824794	Alabama, Dauphin Island	30° 4'53.30"N	30	4	53.3	30.0755	88° 1'47.69"W	88	1	47.69	-88.0246	(Erwin, Olson, Thacker, 2011 (see also Thomas et al., 2020)	Harbour/Inlet/Island	Warm Temperate Northwest Atlantic	Thomas, 2020 paper supports the claim that they are all H. perlevis as well.
Hymeniacidon heliophila	Hymeniacidon perlevis	Molecular and Morphology data	ITS	KT880468	North Carolina	34°10'12.91"N	34	10	12.91	34.1688	77°48'53.45"W	77	48	53.45	-77.8089	Weigel et al., 2015 (see also Thomas et al., 2022	Oyster reef habitat (inlet)	Warm Temperate Northwest Atlantic	Thomas, 2020 paper supports the claim that they are all H. perlevis as well.
Sponge orange (Hymeniacidon perlevis)	Hymeniacidon perlevis	Morphology only			Möwe Bay, Namibia	19°22'20.07"S	19	22	20.07	-19.37	12°42'16.81"E	12	42	16.81	12.7028	Kreiner et al., 2019a, b, c	Intertidal	Temperate Southern Africa (Cold and Warm)	Prof. George Branch was on these surveys
Hymeniacidon perlevis	Hymeniacidon perlevis	Morphology only			Mile 4, Namibia	22°37'26.04"S	22	37	26.04	-22.621	14°31'10.76"E	14	31	10.76	14.5185	Kreiner et al., 2019a, b, c	Intertidal	Temperate Southern Africa (Cold and Warm)	Prof. George Branch was on these surveys
Hymeniacidon perlevis	Hymeniacidon perlevis	Morphology only			Badewane, Namibia	22°40'27.80"S	22	40	27.8	-22.6713	14°31'11.04"E	14	31	11.04	14.5185	Kreiner et al., 2019a, b, c	Intertidal	Temperate Southern Africa (Cold and Warm)	Prof. George Branch was on these surveys
Hymeniacidon perlevis	Hymeniacidon perlevis	Morphology only			Patrysberg, Namibia	22°57'38.02"S	22	57	38.02	-22.9563	14°24'10.99"E	14	24	10.99	14.4018	Kreiner et al., 2019a, b, c	Harbour/inlet	Temperate Southern Africa (Cold and Warm)	Prof. George Branch was on these surveys
Sponge Yellow (Hymeniacidon perlevis)	Hymeniacidon perlevis	Morphology only			Diaz point, Namibia	26°37'58.50"S	26	37	58.5	-26.6264	15° 5'13.06"E	15	5	13.06	15.0855	Kreiner et al., 2019a, b, c	Intertidal	Temperate Southern Africa (Cold and Warm)	Prof. George Branch was on these surveys
Sponge Orange (Hymeniacidon perlevis)	Hymeniacidon perlevis	Morphology only			Grosse Bucht, namibia	26°44'12.51"S	26	44	12.51	-26.7354	15° 5'30.17"E	15	5	30.17	15.0884	Kreiner et al., 2019a, b, c	Intertidal	Temperate Southern Africa (Cold and Warm)	Sample collected by Dr Maya Pfaff and Prof. George Branch was on these surveys
Hymeniacidon perlevis	Hymeniacidon perlevis	Morphology only			Woody Cape and Cape Padrone	33°46'2.81"S	33	46	2.81	-33.7671	26°19'26.74"E	26	19	26.74	26.3211	Samaai data	Intertidal	Temperate Southern Africa (Cold and Warm)	Imtiyaaz Malick collected sample
Hymeniacidon perlevis	Hymeniacidon perlevis	Morphology only			Cape Padrone	33°46'20.22"S	33	46	20.22	-33.77	26°28'6.42"E	26	28	6.42	26.4677	Samaai data	Intertidal	Temperate Southern Africa (Cold and Warm)	Imtiyaaz Malick observational data
Hymeniacidon perlevis	Hymeniacidon perlevis	Morphology only			Port Alfred	33°36'53.27"S	33	36	53.27	-33.6089	26°53'19.77"E	26	53	19.77	26.8866	Samaai data	Intertidal	Temperate Southern Africa (Cold and Warm)	Imtiyaaz Malick observational data
Hymeniacidon perlevis	Hymeniacidon perlevis	Morphology only			Thyspunt	34°11'35.64"S	34	11	35.64	-34.1893	24°42'49.18"E	24	42	49.18	24.7082	Samaai data	Intertidal	Temperate Southern Africa (Cold and Warm)	Imtiyaaz Malick observational data
Hymeniacidon perlevis	Hymeniacidon perlevis	Morphology only			Tsitsikamma	34° 1'26.61"S	34	1	26.61	-34.0211	23°53'47.25"E	23	53	47.25	23.8912	Samaai data	Intertidal	Temperate Southern Africa (Cold and Warm)	Imtiyaaz Malick observational data
Hymeniacidon perlevis	Hymeniacidon perlevis	Morphology only			Canon Rock	33°45'6.06"S	33	45	6.06	-33.751	26°32'47.17"E	26	32	47.17	26.5412	Samaai data	Intertidal	Temperate Southern Africa (Cold and Warm)	Imtiyaaz Malick observational data
Hymeniacidon perlevis	Hymeniacidon perlevis	Morphology only			Pine Lodge, Algoa Bay	34° 0'32.77"S	34	0	32.77	-34.0055	25°41'36.72"E	25	41	36.72	25.6895	Samaai data	Intertidal	Temperate Southern Africa (Cold and Warm)	Imtiyaaz Malick observational data
Hymeniacidon perlevis	Hymeniacidon perlevis	Morphology only			Flat Rock, Algoa Bay	33°59'50.38"S	33	59	50.38	-33.9917	25°41'8.62"E	25	41	8.62	25.6848	Samaai data	Intertidal	Temperate Southern Africa (Cold and Warm)	Imtiyaaz Malick observational data
Hymeniacidon perlevis	Hymeniacidon perlevis	Morphology only			Kenton on Sea	33°41'25.06"S	33	41	25.06	-33.6875	26°40'41.61"E	26	40	41.61	26.6736	Samaai data	Intertidal	Temperate Southern Africa (Cold and Warm)	Imtiyaaz Malick observational data

## Sheet: Namibian distribution
Genus/Species	Locus	Genbank#	Collection location	Lat	degree	minute	seconds	Lat decimal degree	Long	Degree	Minute	Seconds	Long decimal degree	Citation	Occurance (Habitat Type)	Distribution (Spading et al., 2007	Notes
Sponge orange			Möwe Bay	19°22'20.07"S	19	22	20.07	-19.37	12°42'16.81"E	12	42	16.81	12.7028	Kreiner et al., 2019a, b, c	Intertidal
Hymeniacidon perlevis			Mile 4	22°37'26.04"S	22	37	26.04	-22.621	14°31'10.76"E	14	31	10.76	14.5185		Intertidal
Hymeniacidon perlevis			Badewane	22°40'27.80"S	22	40	27.8	-22.6713	14°31'11.04"E	14	31	11.04	14.5185		Intertidal
Hymeniacidon perlevis			Patrysberg	22°57'38.02"S	22	57	38.02	-22.9563	14°24'10.99"E	14	24	10.99	14.4018		Harbour/inlet
Sponge Yellow			Diaz point	26°37'58.50"S	26	37	58.5	-26.6264	15° 5'13.06"E	15	5	13.06	15.0855		Intertidal
Sponge Orange			Grosse Bucht	26°44'12.51"S	26	44	12.51	-26.7354	15° 5'30.17"E	15	5	30.17	15.0884		Intertidal		Sample collected by Dr Maya Pfaff

## Sheet: From Turner 2020
Table S1. Sampling effort and locations. Intertidal / marina sites are listed last. For all subtidal sites, the number of sampling dives is listed, and the cumulative dive time as an estimate of search effort.
Region	Location name	Lat	Long	Dives	Max depth (m)	Cumulative search time (min)	H. sinapium
Monterey	Middle Reef, Pt. Lobos	36.5217	-121.939	1	15	60	not found
Monterey	Hopkin's Marine Station	36.6208	-121.901	1	11	74	not found
Monterey	Perkin's Reef	36.6292	-121.92	1	12	46	not found
Santa Barbara	Arroyo Hondo Reef	34.4718	-120.143	2	8	52	not found
Santa Barbara	Arroyo Quemado Reef	34.4677	-120.119	6	11	265	Present
Santa Barbara	Tajigus	34.4628	-120.102	2	8	93	Present
Santa Barbara	Naples Reef	34.4221	-119.952	6	16	279	Present
Santa Barbara	Elwood Junkpile	34.4269	-119.924	1	12	34	not found
Santa Barbara	Elwood Bluffs	34.4177	-119.901	3	14	138	not found
Santa Barbara	Coal Oil Point	34.4045	-119.879	5	11	257	Present
Santa Barbara	Isla Vista Reef	34.4028	-119.858	4	12	135	Present
Santa Barbara	UCSB intake pipe	34.403	-119.841	1	18	34	not found
Santa Barbara	Goleta Sewer Pipe	34.4142	-119.829	1	6	22	not found
Santa Barbara	Mohawk Reef	34.3941	-119.73	7	9	220	not found
Santa Barbara	1000 Steps	34.3947	-119.713	1	7	30	not found
Santa Barbara	Leadbetter Reef	34.3989	-119.697	1	9	14	not found
Santa Barbara	Oil Platform C	34.3329	-119.632	1	23	39	not found
Santa Barbara	Oil Platform A	34.3319	-119.614	1	27	35	not found
Santa Barbara	Carpinteria Reef	34.3916	-119.542	2	6	61	Present
Los Angeles	Redondo barge	33.8383	-118.41	2	27	49	Present
Los Angeles	Flat rock	33.7966	-118.411	1	8	45	not found
Los Angeles	Resort Wall	33.765	-118.428	1	21	43	Present
Los Angeles	Halfway reef	33.7627	-118.426	1	23	40	not found
Los Angeles	Hawthorne reef	33.7471	-118.421	1	24	39	not found
San Miguel Island	Wreck of the Cuba	34.0301	-120.456	1	10	52	not found
San Miguel Island	Inside of Wycoff Ledge	34.0213	-120.387	1	19	52	not found
San Miguel Island	Miracle Mile, E of Crook Point	34.0137	-120.342	2	20	108	not found
Santa Rosa Island	Johnson's Lee	33.8997	-120.107	2	15	65	not found
Santa Cruz Island	Hazzard's, Santa Cruz Is.	34.0607	-119.828	1	13	75	not found
Santa Cruz Island	Cueva Valdez, Santa Cruz Is.	34.055	-119.82	1	14	75	not found
Santa Cruz Island	Platt's Harbor, Santa Cruz Is.	34.0476	-119.735	1	10	86	not found
Santa Cruz Island	Marmeda, Santa Cruz Is.	33.9838	-119.639	1	13	35	not found
Santa Cruz Island	E. of Marmeda, Santa Cruz Is.	33.9838	-119.613	1	15	38	not found
Santa Cruz Island	The Suburbs, Santa Cruz Isl.	34.0529	-119.583	1	14	59	not found
Santa Cruz Island	Big Rock, Santa Cruz Is.	34.0522	-119.574	5	14	299	not found
Santa Cruz Island	Pink Ribbon	33.9897	-119.525	1	11	60	not found
Santa Cruz Island	Saddleback Ridge	34.0382	-119.525	2	12	134	not found
Anacapa Island	West End, Anacapa Is.	34.0135	-119.446	1	12	40	not found
Anacapa Island	Zebra Cove	34.01	-119.44	1	13	66	not found
Anacapa Island	Landslide Cove, Anacapa Is.	34.0154	-119.436	1	11	49	not found
Anacapa Island	Underwater Island, Anacapa Is.	34.0072	-119.43	2	18	102	not found
Anacapa Island	Cat Rock	34.0043	-119.423	1	11	65	not found
Anacapa Island	Portuguese Rock, Anacapa Is.	34.0155	-119.421	2	26	111	not found
Anacapa Island	Underwater Arch, Anacapa Is.	34.014	-119.362	1	10	45	not found
Anacapa Island	Landing Cove, Anacapa Is.	34.0169	-119.361	1	15	57	not found
Catalina Island	Parson's Landing	33.475	-118.55	2	17	120	not found
Catalina Island	Eel Cove	33.4566	-118.511	1	9	30	not found
Monterey	Point Pinos Intertidal	36.6345	-121.939	n/a	n/a	90	not found
Monterey	Monterey Marina docks	36.608	-121.893	n/a	n/a	20	not found
Santa Barbara	COP Intertidal	34.4067	-119.878	n/a	n/a	60	not found
Los Angeles	22nd Street Marina docks	33.7248	-118.281	n/a	n/a	20	not found
CASIZ California Academy of Sciences Invertebrate Zoology; NHMLA = Natural History Museum of Los Angeles
