# Supplementary material for: Confirmation of the southern African distribution of the marine sponge Hymeniacidon perlevis (Montagu, 1814) in the context of its global dispersal
Source: PeerJ. 2022 Nov 25;10:e14388. doi: 10.7717/peerj.14388 (PMC9703993; doi:10.7717/peerj.14388)
Supplement: Table S2 [file peerj-10-14388-s010.xlsx]

## Sheet: Sheet 1
Location	Taxa ID	Sampled Location	H. perlevis Present/Absent	latitude	Degree	Minute	Second	N/S	Latitude DecimalDegree	longitude	Degree	Minute	Second	E/W	Longitude DecimalDegree
Bettys Bay	Hymeniacidon perlevis	Yes	Present	34° 22.446 S	34	22.446		S	-34.3741	18 54.766 E	18	54.766		E	18.9128
Brazil North	Hymeniacidon perlevis	Yes	Present	29° 48.600	29	48.6		S	-29.8100	17o 04.800	17	4.8		E	17.0800
Dwesa/Cwebe MPA	Hymeniacidon perlevis	Yes	Present	-32.310338	32.310338			S	-32.3103	28.82831700	28.82831700			E	28.8283
Elands Bay	Hymeniacidon perlevis	Yes	Present	32°18'55.54"S	32	18	55.54	S	-32.3093	18°19'40.30"E	18	19	40.3	E	18.3234
False Bay	Hymeniacidon perlevis	Yes	Present	34°07'28"S	34	7	28	S	-34.1213	18°27'10"E	18	27	10	E	18.4517
Gonubie	Hymeniacidon perlevis	Yes	Present	32.941393	32.941393			S	-32.9414	28.03584500	28.03584500			E	28.0358
Green Point	Hymeniacidon perlevis	Yes	Present	33°53'56"S	33	53	56	S	-33.8927	18°22'37"E	18	22	37	E	18.3728
Groenrivier	Hymeniacidon perlevis	Yes	Present	30°29'S	30	29		S	-30.4833	17°20É	17	20		E	17.3333
Groenrivier	Hymeniacidon perlevis	Yes	Present	30° 56.811	30	56.811		S	-30.9469	17° 38.106	17	38.106		E	17.6351
Groenrivier	Hymeniacidon perlevis	Yes	Present	30° 54.926	30	54.926		S	-30.9154	17° 36.169	17	36.169		E	17.6028
Haga Haga	Hymeniacidon perlevis	Yes	Present	32°45' 50.653"S	32	45	50.653	S	-32.7584	28°15' 5.393"S	28	15	5.393	E	28.2509
Jacobs Bay	Hymeniacidon perlevis	Yes	Present	32°58'10.62"S	32	58	10.62	S	-32.9684	17°53'03.81"E	17	53	3.81	E	17.8840
Knysna	Hymeniacidon perlevis	Yes	Present	33° 59.392S	33	59.392		S	-33.9899	23° 32.538E	23	32.538		E	23.5423
Langebaan	Hymeniacidon perlevis	Yes	Present	33° 5'22.15"S	33	5	22.15	S	-33.0870	18° 1'8.03"E	18	1	8.03	E	18.0180
Mazzepa Bay	Hymeniacidon perlevis	Yes	Present	32°28'46"S	32	28	46	S	-32.4743	28°39'08"E	28	39	8	E	28.6513
Monwabisi	Hymeniacidon perlevis	Yes	Present	34°4'28"S	34	4	28	S	-34.0713	18°41'19"E	18	41	19	E	18.6865
Moon Bay	Hymeniacidon perlevis	Yes	Present	30° 48.639	30	48.639		S	-30.8107	17° 33.235	17	33.235		E	17.5539
Grosse Bucht (Namibia)	Hymeniacidon perlevis	Yes	Present	26°44'12.81"S	26	44	12.81	S	-26.7355	15° 5'41.62"E	15	5	41.62	E	15.0903
Nature Valley	Hymeniacidon perlevis	Yes	Present	33° 59'59.93"S	33	59	59.93	S	-33.9933	23° 31'31.41"S	23.000	31	31.41	E	23.5219
Plettenberg Bay	Hymeniacidon perlevis	Yes	Present	34°6'29"E	34	6	29	S	-34.1048	23.38068000	23.381			E	23.3807
Rooiklippies	Hymeniacidon perlevis	Yes	Present	29°44'29.59"S	29	44	29.58	S	-29.7383	17° 3'28.16"E	17	3	28.16	E	17.0547
Saunders Rocks	Hymeniacidon perlevis	Yes	Present	33°52'37"S	33	52	37	S	-33.8728	18°24'29"E	18	24	29	E	18.4048
Strand	Hymeniacidon perlevis	Yes	Present	34°07'30"S	34	7	30	S	-34.1217	18°49'50"E	18	49	50	E	18.8250
Tsitsikamma National Park	Hymeniacidon perlevis	Yes	Present	34° 01'.25.82"S	34	1	25.82	S	-34.0210	23° 53'51.40"S	23	53	51.4	E	23.8919
Coffee Bay		Yes	No H. perlevis	31°59'12"S	31	59	12	S	-31.9853	29°09'10"E	29	9	10	E	29.1517
Jacobs Bay	Hymeniacidon perlevis	Yes	Present	32°58'10.62"S	32	58	10.62	S	-32.9684	17°53'03.81"E	17	53	3.81	E	17.8840
Kosi Bay		Yes	No H. perlevis	27°15.645'S	27	15.645		S	-27.2608	32°46.157'E	32	46.157		E	32.7693
Palm beach		Yes	No H. perlevis	30° 59'10,11"S	30	59	10.11	S	-30.9850	30° 16'40,15"E	30	16	40.15	E	30.2734
Park Rynie		Yes	No H. perlevis	30° 19'05,59"S	30	19	5.59	S	-30.3176	30° 44'34,99"E	30	44	34.99	E	30.7392
Port Edward		Yes	No H. perlevis	31° 03'01,91"	31	3	1.91	S	-31.0503	30° 13'56,69"	30	13	56.69	E	30.2261
Treasure Beach		Yes	No H. perlevis	29°57'16.40"S	29	57	16.4	S	-29.9527	30°59'31.54"E	30	59	31.54	E	30.9886
Umhlanga Rocks		Yes	No H. perlevis	29°43'33.39"S	29	43	33.39	S	-29.7222	31° 5'22.38"E	31	5	22.38	E	31.0871
LalaNek		Yes	No H. perlevis	27°13.486'S	27	13.486		S	-27.2248	32°47.702'E	32	47.702		E	32.7950
RockTail Bay		Yes	No H. perlevis	27°11.178'S	27	11.178		S	-27.1863	32°48.509'E	32	48.509		E	32.8085
Sodwana Bay - Jesser Point		Yes	No H. perlevis	27°11.146'S	27	11.146		S	-27.1858	32°48.506'E	32	48.506		E	32.8084
Nine Mile		Yes	No H. perlevis	27°32.452'S	27	32.452		S	-27.5409	32°40.795'E	32	40.795		E	32.6799
Mabibi		Yes	No H. perlevis	27°20.153'S	27	20.153		S	-27.3359	32°45.077'E	32	45.077		E	32.7513
Kosi Nay - N23		Yes	No H. perlevis	27°15.645'S	27	15.645		S	-27.2608	32°46.157'E	32	46.157		E	32.7693
Rabbit rock		Yes	No H. perlevis	26°55.780'S	26	55.78		S	-26.9297	32°52.673'E	32	52.673		E	32.8779
Bhanga Nek		Yes	No H. perlevis	27°00.731'S	27	0.731		S	-27.0122	32°51.952'E	32	51.952		E	32.8659
Black Rock		Yes	No H. perlevis	27°08.148'S	27	8.148		S	-27.1358	32°49.823'E	32	49.823		E	32.8304
RockTail Bay		Yes	No H. perlevis	27°11.178'S	27	11.178		S	-27.1863	32°48.509'E	32	48.509		E	32.8085
Leven Point		Yes	No H. perlevis	27°55.703'S	27	55.703		S	-27.9284	32°35.691'E	32	35.691		E	32.5949
Cape Vidal		Yes	No H. perlevis	28°07.659'S	28	7.659		S	-28.1277	32°33.641'E	32	33.641		E	32.5607
Mission Rock		Yes	No H. perlevis	28°16'42.43"S	28	16	42.43	S	-28.2737	32°29'08.75"E	32	29	8.75	E	32.4848
Dawson		Yes	No H. perlevis	28°23.008'S	28	23.008		S	-28.3835	32°24.760'E	32	24.76		E	32.4127
Cape St Lucia		Yes	No H. perlevis	28°31.390'S	28	31.39		S	-28.5232	32°24.022'E	32	24.022		E	32.4004
Sheffield Rock		Yes	No H. perlevis	29°29'17.38"S	29	29	17.38	S	-29.4862	31°15'15.72"E	31	15	15.72	E	31.2526
Chaka's Rock		Yes	No H. perlevis	29°31'9.01"S	29	31	9.01	S	-29.5182	31°13'46.42"E	31	13	46.42	E	31.2244
Balito		Yes	No H. perlevis	29°27'9.70"S	29	27	9.7	S	-29.4516	31°17'11.64"E	31	17	11.64	E	31.2853
Isipingo		Yes	No H. perlevis	29°59'51.01"S	29	59	51.01	S	-29.9918	30°56'57.40"E	30	56	57.4	E	30.9429
Sezele		Yes	No H. perlevis	30°24'44.62"S	30	24	44.62	S	-30.4074	30°40'51.06"E	30	40	51.06	E	30.6752
False Bay, -34.1566667 18.84	Hymeniacidon perlevis	Yes	Present	34.1566667° S	34.1566667			S	-34.1567	18.84° E	18.84			E	18.8400
Elizabeth Bay, 20 miles south of Luderitz	Hymeniacidon perlevis	Yes	Present	26.938554° S	26.938554			S	-26.9386	15.159444° E	15.159444			E	15.1594
St. James	Hymeniacidon perlevis	Yes	Present	34.120579° S	34.120579			S	-34.1206	18.459106° E	18.459106			E	18.4591
Oudekraal	Hymeniacidon perlevis	Yes	Present	33.983584° S	33.983584			S	-33.9835	18.358262° E	18.358262			E	18.3583
Oudekraal	Hymeniacidon perlevis	Yes	Present	33.983584° S	33.983584			S	-33.9836	18.358262° E	18.358262			E	18.3583
Port Nolloth	Hymeniacidon perlevis	Yes	Present	29.251883° S	29.251883			S	-29.2519	16.869698° E	16.869698			E	16.8697
East London	Hymeniacidon perlevis	Yes	Present	33.011051° S	33.011051			S	-33.0111	27.910049° E	27.910049			E	27.9100
Port St Johns		Yes	No H. perlevis	-31.6559	-31.6559			S	-31.6559	-31.6559	-31.6559			E	29.5059
Woody Cape and Cape Padrone	Hymeniacidon perlevis	Yes	Present	33°46'2.81"S	33	46	2.81	S	-33.7671	26°19'26.74"E	26	19	26.74	E	26.3211
Cape Padrone	Hymeniacidon perlevis	Yes	Present	33°46'20.22"S	33	46	20.22	S	-33.77	26°28'6.42"E	26	28	6.42	E	26.4677
Port Alfred	Hymeniacidon perlevis	Yes	Present	33°36'53.27"S	33	36	53.27	S	-33.6089	26°53'19.77"E	26	53	19.77	E	26.8866
Thyspunt	Hymeniacidon perlevis	Yes	Present	34°11'35.64"S	34	11	35.64	S	-34.1893	24°42'49.18"E	24	42	49.18	E	24.7082
Tsitsikamma	Hymeniacidon perlevis	Yes	Present	34° 1'26.61"S	34	1	26.61	S	-34.0211	23°53'47.25"E	23	53	47.25	E	23.8912
Canon Rock	Hymeniacidon perlevis	Yes	Present	33°45'6.06"S	33	45	6.06	S	-33.751	26°32'47.17"E	26	32	47.17	E	26.5412
Pine Lodge, Algoa Bay	Hymeniacidon perlevis	Yes	Present	34° 0'32.77"S	34	0	32.77	S	-34.0055	25°41'36.72"E	25	41	36.72	E	25.6895
Flat Rock, Algoa Bay	Hymeniacidon perlevis	Yes	Present	33°59'50.38"S	33	59	50.38	S	-33.9917	25°41'8.62"E	25	41	8.62	E	25.6848
Kenton on Sea	Hymeniacidon perlevis	Yes	Present	33°41'25.06"S	33	41	25.06	S	-33.6875	26°40'41.61"E	26	40	41.61	E	26.6736
