# Supplementary material for: Confirmation of the southern African distribution of the marine sponge Hymeniacidon perlevis (Montagu, 1814) in the context of its global dispersal
Source: PeerJ. 2022 Nov 25;10:e14388. doi: 10.7717/peerj.14388 (PMC9703993; doi:10.7717/peerj.14388)
Supplement: Table S3 [file peerj-10-14388-s011.xlsx]

## Sheet: COI Accession 
TS number	IZIKO Museum Number	GenBank accession numbers - this study	COI GenBank accession numbers from Ngwakum et al. 2021	Genus/Species	Location	Coast	Province	Country	Bioregion	notes (biogeographical breaks)	isolation Source	Collected by	Collection Data
TS2126	SAMC-A091449	ON062377		Hymeniacidon pelevis	Bettys Bay	South coast	Warm temperate South coast	South Africa	Agulhas	Cape Point - Mbashe River	Porifera	T. Samaai	2012-06-05
TS2766	SAMC-A091458	ON062378	MT491492	Hymeniacidon pelevis	Mazeppa Bay	South east coast	Warm temperate South East coast	South Africa	Agulhas	Cape Point - Mbashe River	Porifera	T. Samaai	2015-04-15
TS2765	SAMC-A091457	ON062379		Hymeniacidon pelevis	Mazeppa Bay	South east coast	Warm temperate South East coast	South Africa	Agulhas	Cape Point - Mbashe River	Porifera	T. Samaai	2015-04-15
TS1166	SAMC-A091446	ON062380		Hymeniacidon pelevis	Knysna	South coast	Warm temperate South coast	South Africa	Agulhas	Cape Point - Mbashe River	Porifera	T. Samaai	2008-04-04
TS1167	SAMC-A091447	ON062381		Hymeniacidon pelevis	Tsitsikamma	South coast	Warm temperate South coast	South Africa	Agulhas	Cape Point - Mbashe River	Porifera	T. Samaai	2008-04-08
TS2935	SAMC-A091462	ON062382	MT491493	Hymeniacidon pelevis	Groen Rivier	West Coast	Cool temperate West coast	South Africa	Namaqua	Port Nolloth - Cape Columbine B	Porifera	T. Samaai	2015-08-12
TS2942	MB-A094583	ON062383		Hymeniacidon pelevis	Groen Rivier	West Coast	Cool temperate West coast	South Africa	Namaqua	Port Nolloth - Cape Columbine B	Porifera	T. Samaai	2015-08-13
TS2943	SAMC-A091455	ON062384	MT491494	Hymeniacidon pelevis	Moon Bay	West Coast	Cool temperate West coast	South Africa	Namaqua	Port Nolloth - Cape Columbine B	Porifera	T. Samaai	2015-08-15
TS2946	MB-A094586	ON062385	MT491495	Hymeniacidon pelevis	Moon Bay	West Coast	Cool temperate West coast	South Africa	Namaqua	Port Nolloth - Cape Columbine B	Porifera	T. Samaai	2015-08-16
TS2957	MB-A094587	ON062386	MT491496	Hymeniacidon pelevis	Moon Bay	West Coast	Cool temperate West coast	South Africa	Namaqua	Port Nolloth - Cape Columbine B	Porifera	T. Samaai	2015-08-28
TS2962	MB-A094588	ON062387	MT491497	Hymeniacidon pelevis	Brazil North	West Coast	Cool temperate West coast	South Africa	Namaqua	Port Nolloth - Cape Columbine B	Porifera	T. Samaai	2015-08-30
TS2963	MB-A094589	ON062388	MT491498	Hymeniacidon pelevis	Rooiklippies	West Coast	Cool temperate West coast	South Africa	Namaqua	Port Nolloth - Cape Columbine B	Porifera	T. Samaai	2015-08-31
TS4841	MB-A094592	ON062389	MT491499	Hymeniacidon pelevis	Dwesa	South east coast	Warm temperate South East coast	South Africa	Agulhas	Cape Point - Mbashe River	Porifera	T. Samaai	2016-12-12
TS4855	MB-A094597	ON062390		Hymeniacidon pelevis	Dwesa	South east coast	Warm temperate South East coast	South Africa	Agulhas	Cape Point - Mbashe River	Porifera	T. Samaai	2016-12-13
TS4860	MB-A094598	ON062391	MT491501	Hymeniacidon pelevis	Haga Haga	South east coast	Warm temperate South East coast	South Africa	Agulhas	Cape Point - Mbashe River	Porifera	T. Samaai	2016-12-14
TS4861	MB-A094599	ON062392	MT491502	Hymeniacidon pelevis	Haga Haga	South east coast	Warm temperate South East coast	South Africa	Agulhas	Cape Point - Mbashe River	Porifera	T. Samaai	2016-12-14
TS6065	MB-A094604	ON062393		Hymeniacidon pelevis	Marshstrand (Haga Haga)	South east coast	Warm temperate South East coast	South Africa	Agulhas	Cape Point - Mbashe River	Porifera	T. Samaai	2019-11-28
TS6064	MB-A094603		MT491500	Hymeniacidon pelevis	Dwesa	South east coast	Warm temperate South East coast	South Africa	Agulhas	Cape Point - Mbashe River	Porifera	T. Samaai	2019-11-27
TS6057	MB-A094602	ON062394		Hymeniacidon pelevis	Dwesa	South east coast	Warm temperate South East coast	South Africa	Agulhas	Cape Point - Mbashe River	Porifera	T. Samaai	2019-11-24
TS6056	MB-A094601	ON062395		Hymeniacidon pelevis	Dwesa	South east coast	Warm temperate South East coast	South Africa	Agulhas	Cape Point - Mbashe River	Porifera	T. Samaai	2019-11-24
TS4844	MB-A094593	ON062396		Hymeniacidon pelevis	Dwesa	South east coast	Warm temperate South East coast	South Africa	Agulhas	Cape Point - Mbashe River	Porifera	T. Samaai	2016-12-12
TS2742	SAMC-A091454	ON062397		Hymeniacidon pelevis	Momwabisi	West Coast	Warm temperate South coast	South Africa	South Western Cape	Caoe Columbine - Cape Point	Porifera	T. Samaai	2015-03-05
TS2738	SAMC-A091453	ON062398		Hymeniacidon pelevis	False Bay	South coast	Warm temperate South coast	South Africa	Agulhas	Cape Point - Mbashe River	Porifera	T. Samaai	2015-03-05
TS3359	MB-A094590	ON062399		Hymeniacidon pelevis	Dwesa	South east coast	Warm temperate South East coast	South Africa	Agulhas	Cape Point - Mbashe River	Porifera	T. Samaai	2015-11-09
TS2744	SAMC-A091456	ON062400		Hymeniacidon pelevis	Strand	South coast	Warm temperate South coast	South Africa	Agulhas	Cape Point - Mbashe River	Porifera	T. Samaai	2015-03-05
TS2737	SAMC-A091452	ON062401		Hymeniacidon pelevis	Saunders Rock	West Coast	Cool temperate West coast	South Africa	South Western Cape	Caoe Columbine - Cape Point	Porifera	T. Samaai	2015-03-03
TS359	MB-A094611	ON062402		Hymeniacidon pelevis	Groen Rivier	West Coast	Cool temperate West coast	South Africa	Namaqua	Port Nolloth - Cape Columbine B	Porifera	T. Samaai	1997-11-17

## Sheet: ITS Accession
TS number	Genus/Species	Location	Coast	Province		Bioregion	notes (biogeographical breaks)	ITS GenBank accession numbers from Ngwakum et al. 2021
TS2935	Hymeniacidon pelevis	Groen Rivier	West Coast	Cool temperate West coast		Namaqua	Port Nolloth - Cape Columbine B	MT501797
TS2943	Hymeniacidon pelevis	Moon Bay	West Coast	Cool temperate West coast		Namaqua	Port Nolloth - Cape Columbine B	MT501791
TS2946	Hymeniacidon pelevis	Moon Bay	West Coast	Cool temperate West coast		Namaqua	Port Nolloth - Cape Columbine B	MT501790
TS2957	Hymeniacidon pelevis	Moon Bay	West Coast	Cool temperate West coast		Namaqua	Port Nolloth - Cape Columbine B	MT501788
TS2962	Hymeniacidon pelevis	Brazil North	West Coast	Cool temperate West coast		Namaqua	Port Nolloth - Cape Columbine B	MT501789
TS2963	Hymeniacidon pelevis	Rooiklippies	West Coast	Cool temperate West coast		Namaqua	Port Nolloth - Cape Columbine B	MT501787
TS4860	Hymeniacidon pelevis	Haga Haga	South east coast	Warm temperate South East coast		Agulhas	Cape Point - Mbashe River	MT501793
TS4861	Hymeniacidon pelevis	Haga Haga	South east coast	Warm temperate South East coast		Agulhas	Cape Point - Mbashe River	MT501796
TS4841	Hymeniacidon pelevis	Dwesa	South east coast	Warm temperate South East coast		Agulhas	Cape Point - Mbashe River	MT501794
TS4855	Hymeniacidon pelevis	Dwesa	South east coast	Warm temperate South East coast		Agulhas	Cape Point - Mbashe River	MT501795
TS2766	Hymeniacidon pelevis	Mazeppa Bay	South east coast	Warm temperate South East coast		Agulhas	Cape Point - Mbashe River	MT501792
