# Supplementary material for: Confirmation of the southern African distribution of the marine sponge Hymeniacidon perlevis (Montagu, 1814) in the context of its global dispersal
Source: PeerJ. 2022 Nov 25;10:e14388. doi: 10.7717/peerj.14388 (PMC9703993; doi:10.7717/peerj.14388)
Supplement: Table S4 [file peerj-10-14388-s012.xlsx]

## Sheet: Sheet1
	TS Number ID	Original specimen number	Museum catalogue Number	SiteID	Location	Country	Ecoregion	Phylum	CLASS	SUBCLASS	ORDER	FAMILY	GENUS	SPECIES	Taxa ID	Organism Descriptor	Authority	Event Date	Gear	latitude	Degree	Minute	Second		N/S	DecimalDegree	longitude	Degree	Minute	Second		E/W	DecimalDegree	depth (m)	Depth Range	Depth Catogory	Recorded by /Identification	Habitat	Substrate
1	TS 305	jb-4	SAM-H4904	Jacobs Bay	Jacobs Bay	South Africa	Southern Benguela	Porifera	Demospongiae	Heteroscleromorpha	Suberitida	Halichondriidae	Hymeniacidon	perlevis	Hymeniacidon perlevis	See Samaai and Gibbons 2005	(Montagu, 1814)	1997-11-14	hand collected	32°58'10.62"S	32	58	10.62		S	-32.9684	17°53'03.81"E	17	53	3.81		E	17.884	3-5m	3-5m	shallow reef	T. Samaai		Rocky substrate
2	TS 329	EL-1	MB-A094606	Elands Bay	Elands Bay	South Africa	Southern Benguela	Porifera	Demospongiae	Heteroscleromorpha	Suberitida	Halichondriidae	Hymeniacidon	perlevis	Hymeniacidon perlevis	See Samaai and Gibbons 2005	(Montagu, 1814)	1997-11-17	hand collected	32°18'57.36"S	32	18	57.36		S	-32.3096	17°19'11.97"E	17	19	11.97		E	17.3187	3-6m	3-6m	shallow reef	T. Samaai		Rocky substrate
3	TS 331	EL-37	MB-A094607	Elands Bay	Elands Bay	South Africa	Southern Benguela	Porifera	Demospongiae	Heteroscleromorpha	Suberitida	Halichondriidae	Hymeniacidon	perlevis	Hymeniacidon perlevis	See Samaai and Gibbons 2005	(Montagu, 1814)	1997-11-17	hand collected	32°18'57.36"S	32	18	57.36		S	-32.3096	17°19'11.97"E	17	19	11.97		E	17.3187	3-6m	3-6m	shallow reef	T. Samaai		Rocky substrate
4	TS 337	EL-4	MB-A094608	Elands Bay	Elands Bay	South Africa	Southern Benguela	Porifera	Demospongiae	Heteroscleromorpha	Suberitida	Halichondriidae	Hymeniacidon	perlevis	Hymeniacidon perlevis	See Samaai and Gibbons 2005	(Montagu, 1814)	1997-11-17	hand collected	32°18'57.36"S	32	18	57.36		S	-32.3096	17°19'11.97"E	17	19	11.97		E	17.3187	3-6m	3-6m	shallow reef	T. Samaai		Rocky substrate
5	TS 338	EL-17	MB-A094609	Elands Bay	Elands Bay	South Africa	Southern Benguela	Porifera	Demospongiae	Heteroscleromorpha	Suberitida	Halichondriidae	Hymeniacidon	perlevis	Hymeniacidon perlevis	See Samaai and Gibbons 2005	(Montagu, 1814)	1997-11-17	hand collected	32°18'57.36"S	32	18	57.36		S	-32.3096	17°19'11.97"E	17	19	11.97		E	17.3187	3-6m	3-6m	shallow reef	T. Samaai		Rocky substrate
6	TS 343.3	eb-11	MB-A094610	Elands Bay	Elands Bay	South Africa	Southern Benguela	Porifera	Demospongiae	Heteroscleromorpha	Suberitida	Halichondriidae	Hymeniacidon	perlevis	Hymeniacidon perlevis	See Samaai and Gibbons 2005	(Montagu, 1814)	1997-11-17	hand collected	32°18'57.36"S	32	18	57.36		S	-32.3096	17°19'11.97"E	17	19	11.97		E	17.3187	3-6m	3-6m	shallow reef	T. Samaai		Rocky substrate
7	TS 359	gr13	MB-A094611	Groenrivier	Groenrivier	South Africa	Namaqua	Porifera	Demospongiae	Heteroscleromorpha	Suberitida	Halichondriidae	Hymeniacidon	perlevis	Hymeniacidon perlevis	See Samaai and Gibbons 2005	(Montagu, 1814)	1997-11-17	hand collected	30'29'S	30	29			S	-30.4833	17'20É	17	20			E	17.3333	3m	3m	shallow reef	T. Samaai		Rocky substrate
8	TS 370	gr-42	MB-A094612	Groenrivier	Groenrivier	South Africa	Namaqua	Porifera	Demospongiae	Heteroscleromorpha	Suberitida	Halichondriidae	Hymeniacidon	perlevis	Hymeniacidon perlevis	See Samaai and Gibbons 2005	(Montagu, 1814)	1997-11-28	hand collected	30'29'S	30	29			S	-30.4833	17'20É	17	20			E	17.3333	3m	3m	intertidal	T. Samaai		Rocky substrate
9	TS 381	gr-30	MB-A094613	Groenrivier	Groenrivier	South Africa	Namaqua	Porifera	Demospongiae	Heteroscleromorpha	Suberitida	Halichondriidae	Hymeniacidon	perlevis	Hymeniacidon perlevis	See Samaai and Gibbons 2005	(Montagu, 1814)	1997-12-09	hand collected	30'29'S	30	29			S	-30.4833	17'20É	17	20			E	17.3333	3m	3m	intertidal	T. Samaai		Rocky substrate
10	TS 391	gr-5	MB-A094614	Groenrivier	Groenrivier	South Africa	Namaqua	Porifera	Demospongiae	Heteroscleromorpha	Suberitida	Halichondriidae	Hymeniacidon	perlevis	Hymeniacidon perlevis	See Samaai and Gibbons 2005	(Montagu, 1814)	1997-12-19	hand collected	30'29'S	30	29			S	-30.4833	17'20É	17	20			E	17.3333	3m	3m	intertidal	T. Samaai		Rocky substrate
11	TS 1160	SAF08-Tsits010	SAMC-A091444	Nature Valley reserve - Site 1	Nature Valley	South Africa	Agulhas	Porifera	Demospongiae	Heteroscleromorpha	Suberitida	Halichondriidae	Hymeniacidon	perlevis	Hymeniacidon perlevis	Thinly encrusting. Colour in life orange, interior dirty orange. Some specimens had a stinch of green on the surface. Texture soft and spongy.	(Montagu, 1814)	2008-04-04	hand collected	33° 59'59.93"S	33	59	59.93		S	-33.9933	23° 31'31.41"S	23	31	31.41			23.5219	intertidal		intertidal	T. Samaai	found on horizontal ledge.	Rocky substrate
12	TS 1163	SAF08-Tsits020	SAMC-A091445	Knysna Heads - site 5	Knysna	South Africa	Agulhas	Porifera	Demospongiae	Heteroscleromorpha	Suberitida	Halichondriidae	Hymeniacidon	perlevis	Hymeniacidon perlevis	Thinly encrusting, 3 x 1.5 x 0.2-0.5 cm in diameter. Colour in life orange, interior dirty orange. Some specimens had a stinch of green on the surface. Texture soft and spongy.	(Montagu, 1814)	2008-04-07	hand collected	33 59.392S	33	59.392			S	-33.9899	23 32.538E	23	32.538			E	23.5423	intertidal. In cave area		intertidal	T. Samaai	found on horizontal ledge.	Rocky substrate
13	TS 1166	SAF08-Tsit019	SAMC-A091446	Knysna Heads - site 5	Heads, Knysna	South Africa	Agulhas	Porifera	Demospongiae	Heteroscleromorpha	Suberitida	Halichondriidae	Hymeniacidon	perlevis	Hymeniacidon perlevis	Thinly encrusting, 20 x 18 x 0.2-0.5 cm in diameter. Colour in life, dark red and interior red. Surface undulating but smooth, with ostia 1-2mm evenly scattered over surface. Texture soft and spongy, and easily breakable and compressible.	(Montagu, 1814)	2008-04-07	hand collected	33 59.392S	33	59.392			S	-33.9899	23 32.538E	23	32.538				23.5423	intertidal. In cave area		intertidal	T. Samaai	found on a vertical rocky ledge	Rocky substrate
14	TS 1167	SAF08-Tsits022	SAMC-A091447	Storms Rivier Mond	Storms River mouth, Tsitsikamma National Park	South Africa	Agulhas	Porifera	Demospongiae	Heteroscleromorpha	Suberitida	Halichondriidae	Hymeniacidon	perlevis	Hymeniacidon perlevis	Thinly encrusting, 3 x 1.5 x 0.2-0.5 cm in diameter. Colour in life orange, interior dirty orange. Some specimens had a stinch of green on the surface. Texture soft and spongy.	(Montagu, 1814)	2008-04-08	hand collected	34° 01'.25.82"S	34	1	25.82		S	-34.021	23° 53'51.40"S	23	53	51.4			23.8919	intertidal in crevice		intertidal	T. Samaai	found in crevice exposed.	Rocky substrate
15	TS 1189	SAF08-Tsits029	SAMC-A091448	Robberg	Robberg, Plettenberg Bay	South Africa	Agulhas	Porifera	Demospongiae	Heteroscleromorpha	Suberitida	Halichondriidae	Hymeniacidon	perlevis	Hymeniacidon perlevis	Thinly encrusting, 3 x 1.5 x 0.2-0.5 cm in diameter. Colour in life orange, interior dirty orange. Some specimens had a stinch of green on the surface. Texture soft and spongy.	(Montagu, 1814)	2008-04-10	hand collected	34°6'29"E	34	6	29		S	-34.1048	23.3807	23.3807					23.3807	intertidal		intertidal	T. Samaai		Rocky substrate
16	TS 2115	BB044	SAMC-A091449	Bettys Bay	Bettys Bay	South Africa	Agulhas	Porifera	Demospongiae	Heteroscleromorpha	Suberitida	Halichondriidae	Hymeniacidon	perlevis	Hymeniacidon perlevis	Massive sponge 14.5cm long x 8cm wide x 5.8cm thick. Colour in life, deep orange exterior, light orange/mustard interior. Texture rubbery and dense. Not compressible, tears and breaks hard. Surface undulating but smooth and bumpy. No oscules visible. slimy sponge.	(Montagu, 1814)	2012-06-05	SCUBA	34 22.446 S	34	22.446			S	-34.3741	18 54.766 E	18	54.766			E	18.9128	18.2	18.2	Kelp bed	T. Samaai	Rocky & Kelp Beds	Rocky substrate
17	TS 2730		SAMC-A091450	Tsitsikamma	Tsitsikamma National Park	South Africa	Agulhas	Porifera	Demospongiae	Heteroscleromorpha	Suberitida	Halichondriidae	Hymeniacidon	perlevis	Hymeniacidon perlevis	Thinly encrusting sponge. Color in life, dirty orange- green. In ethanol, ? Texture soft, spongy & fibrous. Very compressible, tears so-so, breaks hard. Surface fuzzy. Oscules 1-2mm diameter, randomly distributed. Tubeworms on sponge.	(Montagu, 1814)	2015-02-22	hand collected	34°01'270"S	34	1.27			S	-34.0212	23°53'45"S	23	53	45		S	23.8908	intertidal		intertidal	T. Samaai		Rocky substrate
18	TS 2736		SAMC-A091451	Green Point	Green Point	South Africa	Southern Benguela	Porifera	Demospongiae	Heteroscleromorpha	Suberitida	Halichondriidae	Hymeniacidon	perlevis	Hymeniacidon perlevis	Thickly encrusting sponge, 9cm long x 7,5cm wide x 2,5cm thick. Color in life, ext: greenish orange, int: orange. Texture soft, spongy & rubbery. Very compressible, tears so-so, breaks hard. Surface bumpy & ridged. Oscules 1-2mm diameter, on surface. On mussel.	(Montagu, 1814)	2015-03-03	hand collected	33°53'56"S	33	53	56	S		-33.8927	18°22'37"E	18	22	37		E	18.3728	intertidal		intertidal	T. Samaai		Rocky substrate
19	TS 2737		SAMC-A091452	Saunders Rocks	Saunders Rocks	South Africa	Southern Benguela	Porifera	Demospongiae	Heteroscleromorpha	Suberitida	Halichondriidae	Hymeniacidon	perlevis	Hymeniacidon perlevis	Thickly encrusting sponge. Color in life, ext: greenish orange, int: orange. Texture soft, spongy & rubbery. Very compressible, tears so-so, breaks hard. Surface bumpy & ridged. Oscules 1-2mm diameter, on surface. Algae on sponge.	(Montagu, 1814)	2015-03-03	hand collected	33°52'37"S	33	52	37	S		-33.8728	18°24'29"E	18	24	29		E	18.4048	intertidal		intertidal	T. Samaai		Rocky substrate
20	TS 2738		SAMC-A091453	Dalebrook	Dalebrook, False Bay	South Africa	Southern Benguela	Porifera	Demospongiae	Heteroscleromorpha	Suberitida	Halichondriidae	Hymeniacidon	perlevis	Hymeniacidon perlevis	Thickly encrusting sponge, 2,5cm long x 1,5cm wide x 50mm thick. Color in life, ext: greenish orange, int: orange. Texture soft, spongy & rubbery. Very compressible, tears so-so, breaks hard. Surface bumpy & ridged. Oscules <1mm diameter, on surface.	(Montagu, 1814)	2015-03-05	hand collected	34°07'28"S	34	7	28	S		-34.1213	18°27'10"E	18	27	10		E	18.4517	intertidal		intertidal	T. Samaai		Rocky substrate
21	TS 2742		SAMC-A091454	Monwabisi	Monwabisi	South Africa	Southern Benguela	Porifera	Demospongiae	Heteroscleromorpha	Suberitida	Halichondriidae	Hymeniacidon	perlevis	Hymeniacidon perlevis	Thickly encrusting sponge, 35mm long x 20mm wide x 15mm thick. Color in life, ext: dark green, int: orange. In ethanol, ? Texture soft, spongy & rubbery. Very compressible, tears & breaks hard. Surface smooth. Oscules 1mm diameter, clustered on surface.	(Montagu, 1814)	2015-03-05	hand collected	34°4'28"S	34	4	28	S		-34.0713	18°41'19"E	18	41	19		E	18.6865	intertidal		intertidal	T. Samaai		Rocky substrate
22	TS 2743		SAMC-A091455	Strand	Strand	South Africa	Southern Benguela	Porifera	Demospongiae	Heteroscleromorpha	Suberitida	Halichondriidae	Hymeniacidon	perlevis	Hymeniacidon perlevis	Thickly encrusting sponge. Color in life, ext: dark green, int: orange. In ethanol, ? Texture soft, spongy & rubbery. Very compressible, tears & breaks hard. Surface smooth. Oscules 1mm diameter, clustered on surface.	(Montagu, 1814)	2015-03-05	hand collected	34°07'30"S	34	7	30	S		-34.1217	18°49'50"E	18	49	50		E	18.825	intertidal		intertidal	T. Samaai		Rocky substrate
23	TS 2744		SAMC-A091456	Strand	Strand	South Africa	Southern Benguela	Porifera	Demospongiae	Heteroscleromorpha	Suberitida	Halichondriidae	Hymeniacidon	perlevis	Hymeniacidon perlevis	Thickly encrusting sponge. Color in life, ext: dark green, int: orange. In ethanol, ? Texture soft, spongy & rubbery. Very compressible, tears & breaks hard. Surface smooth. Oscules 1mm diameter, clustered on surface.	(Montagu, 1814)	2015-03-05	hand collected	34°07'30"S	34	7	30	S		-34.1217	18°49'50"E	18	49	50		E	18.825	intertidal		intertidal	T. Samaai		Rocky substrate
24	TS 2765	Ts 2765	SAMC-A091457	Mazzepa Bay	Mazzepa Bay	South Africa	Agulhas	Porifera	Demospongiae	Heteroscleromorpha	Suberitida	Halichondriidae	Hymeniacidon	perlevis	Hymeniacidon perlevis	Thickly encrusting sponge. Color in life, orange. In ethanol, ? Texture soft & spongy. Medium compressible. Surface undulating but smooth. Oscules 5-8mm diameter, on surface/ turrets.	(Montagu, 1814)	2015-04-15	hand collected	32°28'46"S	32	28	46	S		-32.4743	28°39'08"E	28	39	8		E	28.6513	intertidal		intertidal	T. Samaai		Rocky substrate
25	TS 2766	Ts 2766	SAMC-A091458	Mazzepa Bay	Mazzepa Bay	South Africa	Agulhas	Porifera	Demospongiae	Heteroscleromorpha	Suberitida	Halichondriidae	Hymeniacidon	perlevis	Hymeniacidon perlevis	Thickly encrusting sponge. Color in life, orange. In ethanol, ? Texture soft & spongy. Medium compressible. Surface undulating but smooth. Oscules 5-8mm diameter, on surface. Growing between tube worms	(Montagu, 1814)	2015-04-15	hand collected	32°28'46"S	32	28	46	S		-32.4743	28°39'08"E	28	39	8		E	28.6513	intertidal		intertidal	T. Samaai		Rocky substrate
26	0CDN6092-H	none	SAMC-A091459	Table Top	Algoa Bay	South Africa	Agulhas	Porifera	Demospongiae	Heteroscleromorpha	Suberitida	Halichondriidae	Hymeniacidon	perlevis	Hymeniacidon perlevis	Soft spongy,dirty or out;tears easy, fib,soft conul,thin skin,sm or eggs in N3"&"P3"&"K3"&"J3"	(Montagu, 1814)	04/Oct/1998	SCUBA	33 58.84S	33	58.84			S	-33.9807	025 41.62E	25	41.62			E	25.6937	16	16	shallow temperate reef	MKB	Rocky rf	Rock
27	0CDN6112-C	none	SAMC-A091460	Flat Rock	Algoa Bay	South Africa	Agulhas	Porifera	Demospongiae	Heteroscleromorpha	Suberitida	Halichondriidae	Hymeniacidon	perlevis	Hymeniacidon perlevis	Dk dirty or out;spongy,tears easy,in vsl fib,surf sl ribbed/felty,sct 3mm osc N3"&"P3"&"K3"&"J3"	(Montagu, 1814)	06/Oct/1998	SCUBA	33 59.92S	33	59.92			S	-33.9987	025 41.05E	25	41.05			E	25.6842	0.5	0-1	shallow temperate reef	MKB	Intertidal	Reef/rock flat
28	0CDN6315-X	none	SAMC-A091461	Orient Pier - EL Harb 1	East London	South Africa	Agulhas	Porifera	Demospongiae	Heteroscleromorpha	Suberitida	Halichondriidae	Hymeniacidon	perlevis	Hymeniacidon perlevis	Spongy,tears easily, dirty or,in fib/ fleshy,scat 5mm osc,some raised N3"&"P3"&"K3"&"J3"	(Montagu, 1814)	09/Feb/1999	SCUBA	33 01.67S	33	1.67			S	-33.0278	027 55.05E	27	55.05			E	27.9175	3	3	shallow temperate reef	LJB	Seawall	Cement wall
29	TS 2935		SAMC-A091462	Caravan North, Groenrivier	Caravan North, Groenrivier	South Africa	Namaqua	Porifera	Demospongiae	Heteroscleromorpha	Suberitida	Halichondriidae	Hymeniacidon	perlevis	Hymeniacidon perlevis	Thickly encrusting sponge. Colour in life, orange. Texture soft & spongy. Medium compressible, tears and breaks so-so. Surface bumpy. Oscules on surface.	(Montagu, 1814)	2015-08-12	hand collected	30o 56.811	30	56.811				-30.9469	17o 38.106	17	38.106				17.6351	intertidal	0	intertidal	T. Samaai		Rocky substrate
30	TS 2939		SAMC-A091463	Island Point, Groenrivier	Island Point, Groenrivier	South Africa	Namaqua	Porifera	Demospongiae	Heteroscleromorpha	Suberitida	Halichondriidae	Hymeniacidon	perlevis	Hymeniacidon perlevis	Thickly encrusting sponge. Colour in life, ext: red orange, int: orange. Slimy.	(Montagu, 1814)	2015-08-13	hand collected	30o 54.926	30	54.926				-30.9154	17o 36.169	17	36.169				17.6028	intertidal	0	intertidal	T. Samaai		Rocky substrate
31	TS 2942		MB-A094583	Island Point, Groenrivier	Island Point, Groenrivier	South Africa	Namaqua	Porifera	Demospongiae	Heteroscleromorpha	Suberitida	Halichondriidae	Hymeniacidon	perlevis	Hymeniacidon perlevis	Thickly encrusting sponge. Colour in life, orange with green tinge. Very crombly.	(Montagu, 1814)	2015-08-13	hand collected	30o 54.926	30	54.926				-30.9154	17o 36.169	17	36.169				17.6028	intertidal	0	intertidal	T. Samaai		Rocky substrate
32	TS 2943		MB-A094584	Moon bay	Moon Bay	South Africa	Namaqua	Porifera	Demospongiae	Heteroscleromorpha	Suberitida	Halichondriidae	Hymeniacidon	perlevis	Hymeniacidon perlevis	Thickly encrusting sponge. Colour in life, orange with green tinge. Texture soft, spongy and rubbery. Medium compressible, tears & breaks so-so. Surface rough. Oscules 1-2mm diameter, on surface.	(Montagu, 1814)	2015-08-15	hand collected	30o 48.639	30	48.639				-30.8106	17o 33.235	17	33.235				17.5539	intertidal	0	intertidal	T. Samaai		Rocky substrate
33	TS 2944		MB-A094585	Moon bay	Moon Bay	South Africa	Namaqua	Porifera	Demospongiae	Heteroscleromorpha	Suberitida	Halichondriidae	Hymeniacidon	perlevis	Hymeniacidon perlevis	Thickly encrusting sponge. Colour in life, orange with green tinge. Texture soft, spongy and rubbery. Medium compressible, tears & breaks so-so. Surface rough. Oscules 1-2mm diameter, on surface. On algae.	(Montagu, 1814)	2015-08-15	hand collected	30o 48.639	30	48.639				-30.8106	17o 33.235	17	33.235				17.5539	intertidal	0	intertidal	T. Samaai		Rocky substrate
34	TS 2946		MB-A094586	Moon bay	Moon Bay	South Africa	Namaqua	Porifera	Demospongiae	Heteroscleromorpha	Suberitida	Halichondriidae	Hymeniacidon	perlevis	Hymeniacidon perlevis	Thickly encrusting sponge. Colour in life, orange with green tinge. Texture soft, spongy and brittle. Very compressible, tears & breaks so-so. Surface rough. Oscules 1-2mm diameter, evenly scattered on surface, slightly raised.	(Montagu, 1814)	2015-08-16	hand collected	30o 48.880	30	48.88				-30.8147	17o 33.250	17	33.25				17.5542	0.5	0.5	intertidal	T. Samaai		Rocky substrate
35	TS 2957	NAMA04	MB-A094587	Moon bay	Moon Bay	South Africa	Namaqua	Porifera	Demospongiae	Heteroscleromorpha	Suberitida	Halichondriidae	Hymeniacidon	perlevis	Hymeniacidon perlevis	Thinly encrusting sponge. Colour in life, orange. In ethanol, ?	(Montagu, 1814)	2015-08-28	hand collected	30o 48.642	30	48.642				-30.8107	17o 33.262	17	33.262				17.5544	intertidal	0	intertidal	T. Samaai		Rocky substrate
36	TS 2962	NAMA09	MB-A094588	Brazil North	Brazil North	South Africa	Namaqua	Porifera	Demospongiae	Heteroscleromorpha	Suberitida	Halichondriidae	Hymeniacidon	perlevis	Hymeniacidon perlevis	Thinly encrusting sponge. Colour in life, orange. In ethanol, ?	(Montagu, 1814)	2015-08-30	hand collected	29o 48.600	29	48.6				-29.81	17o 04.800	17	4.8				17.08	intertidal	0	intertidal	T. Samaai		Rocky substrate
37	TS 2963	NAMA10	MB-A094589	Rooiklippies	Rooiklippies	South Africa	Namaqua	Porifera	Demospongiae	Heteroscleromorpha	Suberitida	Halichondriidae	Hymeniacidon	perlevis	Hymeniacidon perlevis	Thinly encrusting sponge. Colour in life, orange. In ethanol, ?	(Montagu, 1814)	2015-08-31	hand collected	29o 44.400	29	44.4				-29.74	17o 36.600	17	36.6				17.61	intertidal	0	intertidal	T. Samaai		Rocky substrate
38	TS 3359	Dwesa 01	MB-A094590	Dwesa	Dwesa/Cwebe MPA	South Africa	Agulhas	Porifera	Demospongiae	Heteroscleromorpha	Suberitida	Halichondriidae	Hymeniacidon	perlevis	Hymeniacidon perlevis	Thickly encrusting sponge, 75mm long x 35mm wide. Colour in life, orange. In ethanol, dark brown? Texture firm & dense. Barely compressible, tears so-so, breaks so-so., surface bumpy. No oscules visible.	(Montagu, 1814)	2015-11-09	hand collected	-32.3103						-32.3103	28.8283						28.8283	1	1	intertidal	T. Samaai		Rocky substrate
39	TS 3361	Dwesa 03	MB-A094591	Dwesa	Dwesa/Cwebe MPA	South Africa	Agulhas	Porifera	Demospongiae	Heteroscleromorpha	Suberitida	Halichondriidae	Hymeniacidon	perlevis	Hymeniacidon perlevis	Thickly encrusting sponge, 85mm long x 50mm wide. Colour in life, orange. In ethanol,cream? Texture firm & dense. Barely compressible, tears so-so, breaks hard. Surface bumpy & rough. Oscules 1-2mm diameter, randomly distributed.	(Montagu, 1814)	2015-11-09	hand collected	-32.3103						-32.3103	28.8283						28.8283	1	1	intertidal	T. Samaai		Rocky substrate
40	TS 4841	D2	MB-A094592	Dwesa	Dwesa/Cwebe MPA	South Africa	Agulhas	Porifera	Demospongiae	Heteroscleromorpha	Suberitida	Halichondriidae	Hymeniacidon	perlevis	Hymeniacidon perlevis	67mm long x 41mm wide x 40mm thick. Form thickly encrusting, amorphous and slight turrets with oscules. Colour dark orange. Texture spongy & dense. Very compressible, tears & breaks easily. Surface undulating but smooth. Oscules 2mm diameter and elongate. Endofauna - worm casts & epifauna - algae & sponge.	(Montagu, 1814)	2016-12-12	hand collected	32°18' 38.966"S	32	18	38.966			-32.3065	28°49' 42.684"S	28	49	42.684			28.8238	intertidal		Intertidal	T. Samaai		Rocky substrate
41	TS 4844	D5	MB-A094593	Dwesa	Dwesa/Cwebe MPA	South Africa	Agulhas	Porifera	Demospongiae	Heteroscleromorpha	Suberitida	Halichondriidae	Hymeniacidon	perlevis	Hymeniacidon perlevis	21mm long x 11mm wide x 6mm thick. Form fragment. Colour dark orange. Texture spongy and dense. Medium compressible, tears & breaks easily. No spicules visible. Surface rough. No oscules visible. Algae on sponge.	(Montagu, 1814)	2016-12-12	hand collected	32°18' 38.966"S	32	18	38.966			-32.3065	28°49' 42.684"S	28	49	42.684			28.8238	intertidal		Intertidal	T. Samaai		Rocky substrate
42	TS 4845	D6	MB-A094594	Dwesa	Dwesa/Cwebe MPA	South Africa	Agulhas	Porifera	Demospongiae	Heteroscleromorpha	Suberitida	Halichondriidae	Hymeniacidon	perlevis	Hymeniacidon perlevis	6mm long x 4mm wide x 3mm thick. Form fragment. Colour dark orange red. Texture spongy & dense. Medium compressible, tears & breaks easily. No spicules visible. Surface slippery. No oscules visible. Slimy with a red exudate.	(Montagu, 1814)	2016-12-12	hand collected	32°18' 38.966"S	32	18	38.966			-32.3065	28°49' 42.684"S	28	49	42.684			28.8238	intertidal		Intertidal	T. Samaai		Rocky substrate
43	TS 4852	CW7	MB-A094595	Cwebe	Dwesa/Cwebe MPA	South Africa	Agulhas	Porifera	Demospongiae	Heteroscleromorpha	Suberitida	Halichondriidae	Hymeniacidon	perlevis	Hymeniacidon perlevis	15mm long x 54mm wide x 35mm thick, thickly encrusting. Color dark orange/red. Texture spongy & dense. Very compressible, tears & breaks easily. No spicules visible. Surface pitted & rough. Oscules 2-3mm diameter, elongate/ semi-circular. Ulva & worm cast on sponge.	(Montagu, 1814)	2016-12-13	hand collected	32°12'31.52"S	32	12	31.52			-32.2053	28°56'57.26"E	28	56	57.26			28.9429	intertidal		Intertidal	T. Samaai		Rocky substrate
44	TS 4854	CW9	MB-A094596	Cwebe	Dwesa/Cwebe MPA	South Africa	Agulhas	Porifera	Demospongiae	Heteroscleromorpha	Suberitida	Halichondriidae	Hymeniacidon	perlevis	Hymeniacidon perlevis	35mm long x 96mm wide 32mm thick, thickly encrusting sponge. Color dark orange/ red. Texture dense & spongy. Medium compressible, tears & breaks easily. No spicules visible. Surface undulating but smooth. Oscules 2-4mm diameter, elongate. Algae, worm casts & barnacles on sponge.	(Montagu, 1814)	2016-12-13	hand collected	32°12'31.52"S	32	12	31.52			-32.2053	28°56'57.26"E	28	56	57.26			28.9429	intertidal		Intertidal	T. Samaai		Rocky substrate
45	TS 4855	CW10	MB-A094597	Cwebe	Dwesa/Cwebe MPA	South Africa	Agulhas	Porifera	Demospongiae	Heteroscleromorpha	Suberitida	Halichondriidae	Hymeniacidon	perlevis	Hymeniacidon perlevis	18mm long x 74mm wide x 40mm thick, thickly encrusting sponge. Color dark orange/ red. Texture spongy & dense. Very compressible, tears & breaks easily. No spicules visible. Surface undulating but smooth. Oscules 2-4mm diameter, elongate. Ulva on sponge.	(Montagu, 1814)	2016-12-13	hand collected	32°12'31.52"S	32	12	31.52			-32.2053	28°56'57.26"E	28	56	57.26			28.9429	intertidal		Intertidal	T. Samaai		Rocky substrate
46	TS 4860	HH4	MB-A094598	Haga Haga	Haga Haga	South Africa	Agulhas	Porifera	Demospongiae	Heteroscleromorpha	Suberitida	Halichondriidae	Hymeniacidon	perlevis	Hymeniacidon perlevis	20mm long x 60mm wide x 41mm thick. Thickly encrusting sponge with turrets. Color dark orange. Texture soft, spongy & falls apart. Medium compressible, tears & breaks easily. Surface undulating but smooth. Oscules <1-3mm diameter, elongate, on apex of turrets. ulva, worm casts and anemones on sponge.	(Montagu, 1814)	2016-12-14	hand collected	32°45' 50.653"S	32	45	50.653			-32.7584	28°15' 5.393"S	28	15	5.393			28.2509	intertidal		Intertidal	T. Samaai		Rocky substrate
47	TS 4861	HH5	MB-A094599	Haga Haga	Haga Haga	South Africa	Agulhas	Porifera	Demospongiae	Heteroscleromorpha	Suberitida	Halichondriidae	Hymeniacidon	perlevis	Hymeniacidon perlevis	27mm long x 61mm wide x 17mm thick. Thickly encrusting sponge. Color dark orange brown. Texture spongy & dense. Medium compressible, tears easily, breaks so-so. Surface undulating but smooth, bumpy & pitted. Oscules 1-3mm diameter, elongate & irregular. ulva & rubble on sponge.	(Montagu, 1814)	2016-12-14	hand collected	32°45' 50.653"S	32	45	50.653			-32.7584	28°15' 5.393"S	28	15	5.393			28.2509	intertidal		Intertidal	T. Samaai		Rocky substrate
48	TS5931	SAMA 24461	SAMA 24461	Schaapen island, Langebaan.	Schaapen island, Langebaan.	South Africa	Southern Benguela	Porifera	Demospongiae	Heteroscleromorpha	Suberitida	Halichondriidae	Hymeniacidon	perlevis	Hymeniacidon perlevis	56mm long x 43mm wide x 28mm thick. Form massive and thickly encrusting. Colour in ethanol, cream. Texture brittle, cheesy, falls apart and soft. Very compressible, tears and breaks easily. Surface rough. Oscules 2mm diameter, raised and random.	(Montagu, 1814)	1961-04-30	hand collected	33° 5'22.19"S	33	5	22.19			-26.7356	18° 1'8.13"E	18	1	8.13			18.018	intertidal		intertidal	T. Samaai		Rocky substrate
49	TS5932	MB-A065479, N12,13	MB-A065479	Port Nolloth	Port Nolloth	South Africa	Namaqua	Porifera	Demospongiae	Heteroscleromorpha	Suberitida	Halichondriidae	Hymeniacidon	perlevis	Hymeniacidon perlevis	54mm long x 53mm wide x 7mm thick. Formthinly encrusting. Colour in ethanol, beige. Texture cheesy, soft and falls apart. Very compressible, tears and breaks easily. Surface rough. Oscules 1mm diameter, single and random.	(Montagu, 1814)	1935-10-27	hand collected	29.251883° S						-29.2519	16.869698° E						16.8697	intertidal		intertidal	T. Samaai		Rocky substrate
50	TS5933	MB-A065281, FAL 59T	MB-A065281	False Bay	False Bay	South Africa	Southern Benguela	Porifera	Demospongiae	Heteroscleromorpha	Suberitida	Halichondriidae	Hymeniacidon	perlevis	Hymeniacidon perlevis	55mm long x 35mm wide x 20mm thick. Form thickly encrusting. Colour in ethanol, cream. Texture dense and fibrous. Medium compressible, tears and breaks so-so. Surface rough and fuzzy. Oscules 1mm diameter, many and random.	(Montagu, 1814)	1952-06-26	SCUBA	34.1566667° S						-34.1567	18.84° E						18.84	intertidal		Kelp bed	T. Samaai		Rocky substrate
51	TS5934	MB-A065481, L562	MB-A065481	Esst London	East London	South Africa	Agulhas	Porifera	Demospongiae	Heteroscleromorpha	Suberitida	Halichondriidae	Hymeniacidon	perlevis	Hymeniacidon perlevis	Form fragment and thickly encrusting. Colour in ethanol, light brown. Texture cheesy, soft and falls apart. Very compressible, tears and breaks easily. Surface rough. Oscules 1mm diameter, random.	(Montagu, 1814)	1938-06-01	hand collected	33.011051° S						-33.0111	27.910049° E						27.91	intertidal		intertidal	T. Samaai		Rocky substrate
52	TS5935	MB-A065476, A407 with A282	MB-A065476	Oiuderkraal	Ouderkraal	South Africa	Southern Benguela	Porifera	Demospongiae	Heteroscleromorpha	Suberitida	Halichondriidae	Hymeniacidon	perlevis	Hymeniacidon perlevis	Form fragment. Colour in ethanol, beige. Texture fragile, rubbery and soft. Vey compressible, tears and breaks easily. Surface rough. Oscules visible.	(Montagu, 1814)	1934-10-08	hand collected	33.983584° S						-33.9836	18.358262° E						18.3583	intertidal		intertidal	T. Samaai		Rocky substrate
53	TS5936	MB-A089004, MM14-157/158 SEAKEYS 14-03	MB-A089004	Gonubie rock pools	Gonubie	South Africa	Agulhas	Porifera	Demospongiae	Heteroscleromorpha	Suberitida	Halichondriidae	Hymeniacidon	perlevis	Hymeniacidon perlevis	40mm long x 19mm wide x 9mm thick. Form thickly encrusting. Colour in ethanol, light brown. Texture fragile and soft. Medium compressible, tears and breaks easily. Surface rough. Straitions visible and prominent. Oscules 2mm diameter, clustered and raised.	(Montagu, 1814)	2014-06-11	hand collected	32, 941393						32, 941393	28.0358						28.0358	intertidal		intertidal	T. Samaai		Rocky substrate
54	TS5937	MB-A065283, F164	MB-A065283	St James	St James	South Africa	Southern Benguela	Porifera	Demospongiae	Heteroscleromorpha	Suberitida	Halichondriidae	Hymeniacidon	perlevis	Hymeniacidon perlevis	27mm long x 21mm wide x 10mm thick. Form thickly encrusting. Colour in ethanol, beige. Texture fragile and soft. Very compressible, tears and breaks easily. Surface smooth. Ostia 1mm diameter, random.	(Montagu, 1814)	1933-09-04	hand collected	-34.1206						-34.1206	18.4591						18.4591	intertidal		intertidal	T. Samaai		Rocky substrate
55	TS5938	MB-A065282, SWA2W	MB-A065282	Elizabeth Bay, 20 miles south of Luderitz	Elizabeth Bay, 20 miles south of Luderitz	Namibia	Namib	Porifera	Demospongiae	Heteroscleromorpha	Suberitida	Halichondriidae	Hymeniacidon	perlevis	Hymeniacidon perlevis	Form fragment. Colour in ethanol, light beige. Texture fragile and soft. Very compressible, tears and breaks easily. Surface rough. Oscules 1mm diameter, single one.	(Montagu, 1814)		hand collected	-26.9386						-26.9386	15.159444° E						15.1594	intertidal		intertidal	T. Samaai		Rocky substrate
56	TS5939	MB-A065457, A282	MB-A065457	Ouderkraal	Ouderkraal	South Africa	Southern Benguela	Porifera	Demospongiae	Heteroscleromorpha	Suberitida	Halichondriidae	Hymeniacidon	perlevis	Hymeniacidon perlevis	Form fragment. Colour in ethanol, light beige. Texture fragile and soft. Very compressible, tears and breaks easily. Surface rough. No Oscules visible.	(Montagu, 1814)	1934-06-27	hand collected	33.983584° S						-33.9836	18.3583							intertidal		intertidal	T. Samaai		Rocky substrate
57	TS5940	Grosse bucht	MB-A094600	Grosse bucht	Grosse bucht	Namibia	Namib	Porifera	Demospongiae	Heteroscleromorpha	Suberitida	Halichondriidae	Hymeniacidon	perlevis	Hymeniacidon perlevis	Form thickly encrusting. Colour in ethanol, beige. Texture fragile and soft. Very compressible, tears and breaks easily. Surface rough. Oscules 2mm diameter, raised and few. Striations prominent.	(Montagu, 1814)	1919-07-30	hand collected	26°44'13.75"S	26	44	13.75			-26.7356	15° 5'37.40"E	15	5	37.4			15.0896	intertidal		intertidal	T. Samaai		Rocky substrate
58	TS6056		MB-A094601	Dwesa cottages	Dwesa/Cwebe MPA	South Africa	Agulhas	Porifera	Demospongiae	Heteroscleromorpha	Suberitida	Halichondriidae	Hymeniacidon	perlevis	Hymeniacidon perlevis	82mm long x 28mm wide x 11mm thick. Form thinly encrusting. Colour orange, in ethanol dark orange. Texture falls apart, fragile and soft. Very compressible, tears and breaks easily. Surface conulose. Oscules 1-2mm diameter, various shapes, irregular and random. Epifauna worm tubes, sponge and algae. Orange exudate.	(Montagu, 1814)	2019-11-24	hand collected	-32.3104						-32.3104	28.8281						28.8281	Intertidal		intertidal	T. Samaai		Rocky substrate
59	TS6057		MB-A094602	Dwesa cottages	Dwesa/Cwebe MPA	South Africa	Agulhas	Porifera	Demospongiae	Heteroscleromorpha	Suberitida	Halichondriidae	Hymeniacidon	perlevis	Hymeniacidon perlevis	71mm long x 37mm wide x 19mm thick. Form thinly encrusting. Colour in ethanol bright orange. Texture rubbery, soft and spongy. Very compressible, tears and breaks easily. Surface conulose. Oscules 1-2mm diameterm raised, fistulose and random. Worm tubes on sponge. Light orange exudate.	(Montagu, 1814)	2019-11-24	hand collected	-32.3104						-32.3104	28.8281						28.8281	Intertidal		intertidal	T. Samaai		Rocky substrate
60	TS6064		MB-A094603	Dwesa Nqabara	Dwesa/Cwebe MPA	South Africa	Agulhas	Porifera	Demospongiae	Heteroscleromorpha	Suberitida	Halichondriidae	Hymeniacidon	perlevis	Hymeniacidon perlevis	52mm long x 16mm wide x 11mm thick. Form thinly encrusting. Colour in ethanol, salmon orange. Texture fragile, soft and spongy. Very compressible, tears and breaks easily. Surface smooth. Oscules 1mm diameter, raised and all over. Algae and bryozoa on sponge. Orange exudate.	(Montagu, 1814)	2019-11-27	hand collected	-32.3401						-32.3401	28.7954						28.8281	Intertidal		intertidal	T. Samaai		Rocky substrate
61	TS6065		MB-A094604	Marshstrand	Haga Haga	South Africa	Agulhas	Porifera	Demospongiae	Heteroscleromorpha	Suberitida	Halichondriidae	Hymeniacidon	perlevis	Hymeniacidon perlevis	29mm long x 30mm wide x 30mm thick. Form conulose, fragment and thickly encrusting. Colour orange, in ethanol, salmon beige ext and orange interior. Texture rubbry, soft and spongy. Very compressible, tears and breaks so-so. Surface smooth. Oscules 2mm diameter on tiny turrets. orange exudate.	(Montagu, 1814)	2019-11-28	hand collected	-3275037						-3275037	28.2795						28.8281	Intertidal		intertidal	T. Samaai		Rocky substrate
62	TS6066		MB-A094605	Haga haga	Haga Haga	South Africa	Agulhas	Porifera	Demospongiae	Heteroscleromorpha	Suberitida	Halichondriidae	Hymeniacidon	perlevis	Hymeniacidon perlevis	41mm long x 28mm wide x 20mm thick. Form thickly encrusting. Colour orange and in ethanol, orange. Texture rubbery, soft and spongy. Very compressible, tears and breaks easily. Surface undulating but smooth. Oscules 1-2mm diameter, some raised and many. Hydroid on sponge. Orange exudate.	(Montagu, 1814)	2019-11-29	hand collected	-32.7631						-32.7631	28.2527						28.8281	Intertidal		intertidal	T. Samaai		Rocky substrate

## Sheet: Sheet2
	TS Number ID	Original specimen number	Other collection	Museum catalogue Number	Station no/Site ID	Trawl/Dredge/Sled no/Deployment no	Grid number	SiteID	Location	Country	Ecoregion	Phylum	CLASS	SUBCLASS	ORDER	FAMILY	GENUS	SPECIES	Taxa ID	Organism Descriptor	previous identification	Authority	Event Date	Gear	Vessel	latitude	Degree	Minute	Second		N/S	DecimalDegree	longitude	Degree	Minute	Second		E/W	DecimalDegree	depth (m)	Depth Range	Depth Catogory	Main preservation	Photo Insitu number	Photo above water number	Molecular voucher sample	Duplicate sample)	Chemical voucher sample	Isotope sample taken
1	TS 305	jb-4		sam-h4904	N/A	N/A	N/A	Jacobs Bay	Jacobs Bay	South Africa	Southern Benguela	Porifera	Demospongiae	Heteroscleromorpha	Suberitida	Halichondriidae	Hymeniacidon	perlevis	Hymeniacidon perlevis			(Montagu, 1814)	1997-11-14			32°58'10.62"S	32	58	10.62		S	-32.9684	17°53'03.81"E	17	53	3.81		E	17.884	3-5m	3-5m	shallow reef	96% Ethanol
2	TS 329	EL-1		sam-h4904	N/A	N/A	N/A	Elands Bay	Elands Bay	South Africa	Southern Benguela	Porifera	Demospongiae	Heteroscleromorpha	Suberitida	Halichondriidae	Hymeniacidon	perlevis	Hymeniacidon perlevis			(Montagu, 1814)	1997-11-17			32°18'57.36"S	32	18	57.36		S	-32.3096	17°19'11.97"E	17	19	11.97		E	17.3187	3-6m	3-6m	shallow reef	96% Ethanol
[truncated: 12 more columns]
