# Supplementary material for: Confirmation of the southern African distribution of the marine sponge Hymeniacidon perlevis (Montagu, 1814) in the context of its global dispersal
Source: PeerJ. 2022 Nov 25;10:e14388. doi: 10.7717/peerj.14388 (PMC9703993; doi:10.7717/peerj.14388)
Supplement: Table S5 — Values are in micrometers. [file peerj-10-14388-s013.xlsx]

## Sheet: Sheet1
Species	Current Identification	Country	Specimen	Styles (Large)	Habitat	Depth	Notes
H. perlevis sensu Samaai & Gibbons (2005	H. perlevis	South Africa	SAM-H4904	337 X 7 (7) μm	A thickly encrusting sponge with erect processes that arise from a thin basal. In sheltered, or moderately exposed localities. Surface smooth and tuberculate, thrown into irregular folds, or covered with branching processes. Oscules scattered, level with surface or elevated on low cones or on digitate processes, 0.5–1.5 mm in diameter. Texture firm, soft, fleshy, but compact and compressible. Col…	Intertidal and shallow subtidal
H. perlevis	H. perlevis	Argentina	MNRJ 16705	128–259.5 (58,4)–372 μm 5.0–10.5 (1.9)–15 μm	Cushion-shaped, bearing irregular projections; Surface even or irregularly grooved with soft consistency; Colour alive is usually an orange-yellow, but frequent deviations to yellow (pale or vivid), as well as to orange (even subtly reddish orange) are found; Styles, straight or slightly curved	Intertidal and shallow subtidal
H. perlevis (Montagu, 1814) (sensu Erpenbeck and Van Soest, 2002)	H. perlevis	Devon, South England		152–475 x 3–12 μm (slightly curved, often w. faint subterminal tylote swelling)	Thickly encrusting, orange-brown in dry condition. Surface covered with irregularly shaped short papillae and small digitations. The sponge has a fleshy consistency, with the colour in life varying from orange to blood-red depending on geographical location (Ackers, 2007). The ectosomal skeleton is a dense crust, being paratangential as opposed to strictly tangential arrangement. The choanosomal …	Interidal - NE Atlantic, Mediterranean, Macarronesian Isls.
Hymeniacidon perleve (Montagu, 1818:86) sensu Ackers et al, 2007	H. perlevis	Portrush, Northern Ireland; Saltee Islands, Ireland	BELUM : Mc108; BELUM : Mc612	Shore form: 230-(255)-280 μm; Sublittoral form: 300-(375)-475 μm	Thin sheets and cushion shape; the colour is seen to be a deep dirty orange to brick red. Surface uneven, wrinkled, irregularly folded, with welldeveloped tubercles. Main skeleton disordered, a confused reticulation with a tendency to form ill-defined ascending fibres. Ectosomal skeleton is a tangential layer of spicules inter-crossing in all directions, or of brushes of spicules set vertically t…	Intertidal; Subtidal
H. perlevis sensu Cuartas (1985; as H. sanguinea Grant, 1826)	H. perlevis	Argentina		I. 410–450 x 10 μm (fusiform, slightly curved) II. 240 x 5 μm (bi– or trilobed head)	Encrust. (up to 3 mm thick), mammillate where permanently submerged; surf. may be darker due to sediment layer, w. suectos. canals converging towards oscs.	Intertidal – Mar del Plata, N Argentinean coast (warm temperate SW Atlantic)
H. sinapium de Laubenfels, 1930 (sensu de Laubenfels, 1932)	H. perlevis	California		up to 340 x 9 μm	Amorphous, massive, encrust., often w. digit. proc.; up to 10 cm high, 20 cm diam. Consist. very soft. Live colour bright yellow, sometimes w. orange tints; drab upon preservation. Oscs. (ca. 2 mm diam.) often on raised proc. Surf. superf. smooth, w. scattered low conules (< 1 mm high).	Intertidal to 5 m (?) depth – California (warm temperate NE Pacific)
H. caruncula 1921.143.1443 sensu Stephens (1915)	H. perlevis	South Africa		336 (317-384) x 9,6 μm	Thickly encrusting almost oval, convex upper surface, 12 cm lengh, with a thickness of 3 cm. Osula visible, 1-1.5 mm. Styles of different lenghts	Intertidal
H. caruncula Ireland specimen in Stephens (1915)	H. perlevis	Ireland		425 x 9 μm	According to Stephens (1915), this is similar to the South African specimens of H. caruncula
L. stylifera (Stephens, 1915) 1921.143.1444	H. stylifera	South Africa		370-580 x 10-15 μm in Stephens (1915). [463 (403-509) x 12 (12) μm] μm as newly measured. The styles have a tendency to become subtylostyles. The styles fall into two groups.	Thickly encrusting. Colour yellowish or browninsh in ethanol	Subtidal, 45 m. Some specimens were collected from Saldanha Bay shore	It is considered that the deep water specimen is H. styliferus. The intertidal specimens could be specimens of H. perlevis. H. styliferus was also described by Uriz (1988) from Namibia.
L. stylifera sensu Uriz (1988)	H. stylifera	Namibia		330-415 x 12-17 μm	Thickly encrusting. Whitish in ethanol	183 m
H. sublittoralis Samaai & Gibbons (2005)	H. sublittoralis	South Africa		394 (255–601) x 14 (14) μm	A thick, massive, erect, amorphous sponge, with numerous papillate processes that vary greatly in length. Surface smooth with various ridge-like structures, finely hispid and colour in situ yellow. Styles are large and thick with heads slightly subtylote,	Shallow subtidal
H. heliophila (Wilson, 1911) (sensu D az et al. 1993)	H. perlevis	Caribbean		130–450 x 3–10 μm ((subtylo)styles)	Encrust. uneven surf. but smooth; compressible and fleshy consist. Colour-alive light to deep orange, tan in spirit. In fistulose projs. Spicule tracts are obvious and usually longit.	Shallow coastal environments – widespread in the Caribbean
